# Supplementary material for: Systems Analysis of Drug-Induced Receptor Tyrosine Kinase Reprogramming Following Targeted Mono- and Combination Anti-Cancer Therapy
Source: PubMed Central journal article supplement (PMC4092865; doi:10.3390/cells3020563), 2014-06-10
Supplement: cells-03-00563-s003.pdf [file cells-03-00563-s003.pdf]

## Supplementary 3

### Mathematical model of Ras/RAF/MEK/ERK and PI3K/PTEN/AKT pathway

#### System of ordinary differential equations

$$\frac{d[E3]}{dt} = -V_1 \quad (S3.1)$$

$$\frac{d[E3H]}{dt} = V_1 - V_2 - V_{51} - V_{66} \quad (S3.2)$$

$$\frac{d[HRG]}{dt} = -V_1 \quad (S3.3)$$

$$\frac{d[E3H_c]}{dt} = V_{51} - V_{52} \quad (S3.4)$$

$$\frac{d[E2]}{dt} = -V_2 - V_{49} - V_{52} - V_{59} - V_{65} - V_{72} - V_{85} \quad (S3.5)$$

$$\frac{d[E23H]}{dt} = V_2 - V_3 + V_4 + V_{52} - V_{53} \quad (S3.6)$$

$$\frac{d[E23H_c]}{dt} = V_{53} - V_{54} \quad (S3.7)$$

$$\frac{d[pE23H]}{dt} = V_3 - V_4 - V_5 + V_8 - V_{27} + V_{29} - V_{48} + V_{54} \quad (S3.8)$$

$$\frac{d[Shc]}{dt} = -V_5 + V_{10} - V_{60} \quad (S3.9)$$

$$\frac{d[pE23H-Shc]}{dt} = V_5 - V_6 \quad (S3.10)$$

$$\frac{d[pE23H-pShc]}{dt} = V_6 - V_7 \quad (S3.11)$$

$$\frac{d[GS]}{dt} = -V_7 + V_9 - V_{63} - V_{71} \quad (S3.12)$$

$$\frac{d[Shc-GS]}{dt} = V_8 - V_9 - V_{64} - V_{71} - V_{77} - V_{83} \quad (S3.13)$$

$$\frac{d[pShc]}{dt} = V_9 - V_{10} \quad (S3.14)$$

$$\frac{d[pE23H-pShc-GS]}{dt} = V_7 - V_8 \quad (S3.15)$$

$$\frac{d[ppAkt-PIP3]}{dt} = V_{44} - V_{45} \quad (S3.16)$$

$$\frac{d[Ras-GDP]}{dt} = -V_{11} + V_{12} \quad (S3.17)$$

$$\frac{d[Ras-GTP]}{dt} = V_{11} - V_{12} \quad (S3.18)$$

$$\frac{d[Raf]}{dt} = -V_{13} + V_{14} \quad (S3.19)$$

$$\frac{d[\text{Raf}^*]}{dt} = V_{13} - V_{14} \quad (\text{S3.20})$$

$$\frac{d[\text{MEK}]}{dt} = -V_{15} + V_{18} \quad (\text{S3.21})$$

$$\frac{d[\text{pMEK}]}{dt} = V_{15} - V_{16} - V_{19} + V_{22} \quad (\text{S3.22})$$

$$\frac{d[\text{PP2A}]}{dt} = -V_{16} + V_{18} - V_{20} + V_{22} - V_{41} + V_{43} - V_{45} + V_{47} \quad (\text{S3.23})$$

$$\frac{d[\text{MEKP-PP2A}]}{dt} = V_{16} - V_{17} + V_{21} - V_{22} \quad (\text{S3.24})$$

$$\frac{d[\text{MEK-PP2A}]}{dt} = V_{17} - V_{18} \quad (\text{S3.25})$$

$$\frac{d[\text{pAkt-PIP3-PP2A}]}{dt} = V_{41} - V_{42} + V_{46} - V_{47} \quad (\text{S3.26})$$

$$\frac{d[\text{ppMEKPP-PP2A}]}{dt} = V_{20} - V_{21} \quad (\text{S3.27})$$

$$\frac{d[\text{ppMEKPP-PP2A}]}{dt} = V_{20} - V_{21} \quad (\text{S3.28})$$

$$\frac{d[\text{ppMEK}]}{dt} = V_{19} - V_{20} \quad (\text{S3.29})$$

$$\frac{d[\text{ERK}]}{dt} = -V_{23} + V_{24} \quad (\text{S3.30})$$

$$\frac{d[\text{pERKP}]}{dt} = V_{23} - V_{24} - V_{25} + V_{26} \quad (\text{S3.31})$$

$$\frac{d[\text{ppERK}]}{dt} = V_{25} - V_{26} \quad (\text{S3.32})$$

$$\frac{d[\text{ppAkt-PIP3-PP2A}]}{dt} = V_{45} - V_{46} \quad (\text{S3.33})$$

$$\frac{d[\text{Akt-PIP3}]}{dt} = V_{39} - V_{40} + V_{43} \quad (\text{S3.34})$$

$$\frac{d[\text{PI3K}]}{dt} = -V_{27} + V_{30} - V_{58} - V_{84} \quad (\text{S3.35})$$

$$\frac{d[\text{pE23H-PI3K}]}{dt} = V_{27} \quad (\text{S3.36})$$

$$\frac{d[\text{PI}]}{dt} = -V_{31} + V_{34} \quad (\text{S3.37})$$

$$\frac{d[\text{PTEN}]}{dt} = -V_{32} + V_{34} - V_{35} - V_{36} + 2V_{38} \quad (\text{S3.38})$$

$$\frac{d[\text{PIP3}]}{dt} = -V_{32} - V_{39} \quad (\text{S3.39})$$

$$\frac{d[\text{PTEN-PIP3}]}{dt} = V_{32} - V_{33} \quad (\text{S3.40})$$

$$\frac{d[\text{PTEN-PI}]}{dt} = V_{33} - V_{34} \quad (\text{S3.41})$$

$$\frac{d[\text{pPTEN}]}{dt} = V_{35} - V_{36} \quad (\text{S3.42})$$

$$\frac{d[\text{pPTENP-PTEN}]}{dt} = V_{36} - V_{37} \quad (\text{S3.43})$$

$$\frac{d[\text{PTEN-PTEN}]}{dt} = V_{37} - V_{38} \quad (\text{S3.44})$$

$$\frac{d[\text{PI3K*}-\text{PI}]}{dt} = V_{31} - V_{55} \quad (\text{S3.45})$$

$$\frac{d[\text{PI3K*}-\text{PIP3}]}{dt} = V_{55} - V_{56} \quad (\text{S3.46})$$

$$\frac{d[\text{Akt}]}{dt} = -V_{39} \quad (\text{S3.47})$$

$$\frac{d[\text{pAkt-PIP3}]}{dt} = V_{40} - V_{41} - V_{44} + V_{47} \quad (\text{S3.48})$$

$$\frac{d[\text{Akt-PIP3-PP2A}]}{dt} = V_{42} - V_{43} \quad (\text{S3.49})$$

$$\frac{d[2\text{C4}]}{dt} = -V_{49} \quad (\text{S3.50})$$

$$\frac{d[\text{E2-2C4}]}{dt} = V_{49} - V_{50} \quad (\text{S3.51})$$

$$\frac{d[\text{E2-2C4}_c]}{dt} = V_{50} \quad (\text{S3.52})$$

$$\frac{d[\text{E22}]}{dt} = V_{59} - V_{60} \quad (\text{S3.53})$$

$$\frac{d[\text{pE22}]}{dt} = V_{60} \quad (\text{S3.54})$$

$$\frac{d[\text{pE22}_\text{Sch}]}{dt} = V_{61} \quad (\text{S3.55})$$

$$\frac{d[\text{pE22-pSch}]}{dt} = V_{62} \quad (\text{S3.56})$$

$$\frac{d[\text{pE22-pSch-GS}]}{dt} = V_{63} - V_{64} \quad (\text{S3.57})$$

$$\frac{d[\text{E2-Tr}]}{dt} = V_{65} \quad (\text{S3.58})$$

$$\frac{d[\text{E23H-Tr}]}{dt} = V_{66} \quad (\text{S3.59})$$

$$\frac{d[\text{pE23H-Tr}]}{dt} = V_{67} \quad (\text{S3.60})$$

$$\frac{d[\text{pE23H-Tr-Shc}]}{dt} = V_{68} \quad (\text{S3.61})$$

$$\frac{d[\text{pE23H-Tr-pShc}]}{dt} = V_{69} \quad (\text{S3.62})$$

$$\frac{d[\text{pE23H-Tr-pShc-GS}]}{dt} = V_{70} - V_{71} \quad (\text{S3.63})$$

$$\frac{d[\text{E22-Per}]}{dt} = V_{72} \quad (\text{S3.64})$$

$$\frac{d[\text{pE22-Per}]}{dt} = V_{73} \quad (\text{S3.65})$$

$$\frac{d[\text{pE22-Sch-Per}]}{dt} = V_{74} \quad (\text{S3.66})$$

$$\frac{d[\text{pE22-Per-pSch}]}{dt} = V_{75} \quad (\text{S3.67})$$

$$\frac{d[\text{pE22-Per-pSch-GS}]}{dt} = V_{76} - V_{77} \quad (\text{S3.68})$$

$$\frac{d[\text{E22-Per2}]}{dt} = V_{78} \quad (\text{S3.69})$$

$$\frac{d[\text{pE22-Per2}]}{dt} = V_{79} \quad (\text{S3.70})$$

$$\frac{d[\text{pE22-Per2-Shc}]}{dt} = V_{80} \quad (\text{S3.71})$$

$$\frac{d[\text{pE22-Per2-pShc}]}{dt} = V_{81} \quad (\text{S3.72})$$

$$\frac{d[\text{pE22-Per2-pShc-GS}]}{dt} = V_{82} - V_{83} \quad (\text{S3.73})$$

$$\frac{d[\text{pE23H-Tr-PI3K}]}{dt} = V_{84} \quad (\text{S3.74})$$

$$\frac{d[\text{E2-Per}]}{dt} = V_{85} \quad (\text{S3.75})$$

$$\frac{d[\text{E2-Tr-Per}]}{dt} = V_{86}, \quad (\text{S3.76})$$

where reaction rates  $V_i$  are determined by the following equations:

$$V_1 = k_1 \cdot ([\text{E3}] \cdot [\text{HRG}] - K_{d,1} \cdot [\text{E3H}]) \quad (\text{S3.77})$$

$$V_2 = k_2 \cdot ([\text{E3H}] \cdot [\text{E2}] - K_{d,2} \cdot [\text{E23H}]) \quad (\text{S3.78})$$

$$V_3 = k_3 \cdot [\text{E23H}] / (K_{d,3} + [\text{E23H}]) \quad (\text{S3.79})$$

$$V_4 = V_{\max,4} \cdot [\text{pE23H}] / (K_{m,4} + [\text{pE23H}]) \quad (\text{S3.80})$$

$$V_5 = k_5 \cdot ([\text{pE23H}] \cdot [\text{Shc}] - K_{d,5} \cdot [\text{pE23H-Shc}]) \quad (\text{S3.81})$$

$$V_6 = k_6 \cdot [\text{pE23H-Shc}] / (K_{d,6} + [\text{pE23H-Shc}]) \quad (\text{S3.82})$$

$$V_7 = k_7 \cdot ([\text{pE23H-pShc}] \cdot [\text{GS}] - K_{d,7} \cdot [\text{pE23H-pShc-GS}]) \quad (\text{S3.83})$$

$$V_8 = k_8 \cdot ([\text{pE23H-Shc-GS}] - K_{d,8} \cdot [\text{pE23HP}] \cdot [\text{Shc-GS}]) \quad (\text{S3.84})$$

$$V_9 = k_9 \cdot [\text{Shc-GS}] - k_{-9} \cdot [\text{pShc}] \cdot [\text{GS}] \quad (\text{S3.85})$$

$$V_{10} = V_{\text{max},10} \cdot [\text{pShc}] / (K_{m,10} + [\text{pShc}]) \quad (\text{S3.86})$$

$$V_{11} = k_{11} \cdot [\text{Ras-GDP}] \cdot ([\text{Shc-GS}] + [\text{pE23H-Shc-GS}] + [\text{pE22-pShc-GS}] + [\text{pE23H-Tr-pShc-GS}] + [\text{pE22-Per-pShc-GS}] + [\text{pE22-Per2-pShc-GS}]) / (K_{m,11} + [\text{Ras-GDP}]) \quad (\text{S3.87})$$

$$V_{12} = V_{12} \cdot [\text{Ras-GTP}] / (K_{m,12} + [\text{Ras-GTP}]) \quad (\text{S3.88})$$

$$V_{13} = k_{13} \cdot [\text{Raf}] \cdot [\text{Ras-GTP}] / (K_{m,13} + [\text{Raf}]) \quad (\text{S3.89})$$

$$V_{14} = k_{14} \cdot [\text{Raf}^*] \cdot ([\text{ppAkt-PIP3}] + [E_{\text{Raf}}]) / ([\text{Raf}^*] + K_{m,14}) \quad (\text{S3.90})$$

$$V_{15} = k_{15} \cdot [\text{MEK}] \cdot [\text{Raf}^*] / (K_{m,15} + [\text{MEK}]) \quad (\text{S3.91})$$

$$V_{16} = k_{16} \cdot [\text{pMEK}] \cdot [\text{PP2A}] \quad (\text{S3.92})$$

$$V_{17} = k_{\text{cat},16} \cdot [\text{pMEK-PP2A}] \quad (\text{S3.93})$$

$$V_{18} = k_{18} \cdot [\text{MEK-PP2A}] \quad (\text{S3.94})$$

$$V_{19} = k_{15} \cdot [\text{pMEK}] \cdot [\text{Raf}^*] / (K_{m,15} + [\text{pMEK}]) \quad (\text{S3.95})$$

$$V_{20} = k_{16} \cdot ([\text{PP2A}] \cdot [\text{ppMEK}] - K_{d,16} \cdot [\text{ppMEK-PP2A}]) \quad (\text{S3.96})$$

$$V_{21} = k_{\text{cat},16} \cdot [\text{ppMEK-PP2A}] \quad (\text{S3.97})$$

$$V_{22} = k_{22} \cdot [\text{pMEK-PP2A}] \quad (\text{S3.98})$$

$$V_{23} = k_{23} \cdot [\text{ERK}] \cdot [\text{ppMEK}] / (K_{m,23} + [\text{ERK}]) \quad (\text{S3.99})$$

$$V_{24} = V_{\text{max},24} \cdot [\text{pERK}] / (K_{m,24} + [\text{pERK}]) \quad (\text{S3.80})$$

$$V_{25} = k_{23} \cdot [\text{ppMEK}] \cdot [\text{pERK}] / (K_{m,23} + [\text{pERK}]) \quad (\text{S3.81})$$

$$V_{26} = V_{\text{max},24} \cdot [\text{ppERK}] / (K_{m,24} + [\text{ppERK}]) \quad (\text{S3.82})$$

$$V_{27} = k_{27} \cdot ([\text{pE23H}] \cdot [\text{PI3K}] - K_{d,27} \cdot [\text{pE23H-PI3K}]) \quad (\text{S3.83})$$

$$V_{28} = k_{28} \cdot [\text{pE23H-PI3K}] \quad (\text{S3.84})$$

$$V_{29} = k_{29} \cdot [\text{pE23H-PI3K}^*] \quad (\text{S3.85})$$

$$V_{30} = k_{30} \cdot [\text{pE23H-PI3K}] \quad (\text{S3.86})$$

$$V_{31} = k_{31} \cdot [\text{PI}] \cdot ([\text{pE23H-PI3K}] + [\text{pE23H-Tr-PI3K}]) / (K_{d,31} + [\text{PI}]) \quad (\text{S3.87})$$

$$V_{32} = k_{32} \cdot ([\text{PIP3}] \cdot [\text{PTEN}] - K_{d,32} \cdot [\text{PTEN-PIP3}]) \quad (\text{S3.88})$$

$$V_{33} = k_{33} \cdot [\text{PTEN-PIP3}] \quad (\text{S3.89})$$

$$V_{34} = k_{34} \cdot [\text{PTEN-PI}] \quad (\text{S3.90})$$

$$V_{35} = V_{\text{max},35} \cdot [\text{PTEN}] / (K_{m,35} + [\text{PTEN}]) \quad (\text{S3.91})$$

$$V_{36} = k_{36} \cdot ([\text{PTEN}] \cdot [\text{pPTEN}] - K_{d,36} \cdot [\text{pTENP-PTEN}]) \quad (\text{S3.92})$$

$$V_{37} = k_{\text{cat},37} \cdot [\text{pPTENP-PTEN}] \quad (\text{S3.93})$$

$$V_{38} = k_{38} \cdot [\text{PTEN-PTEN}] \quad (\text{S3.94})$$

$$V_{39} = k_{39} \cdot ([\text{PIP3}] \cdot [\text{Akt}] - K_{d,39} \cdot [\text{Akt-PIP3}]) \quad (\text{S3.95})$$

$$V_{40} = V_{\text{max},40} \cdot [\text{Akt-PIP3}] / (K_{m,40} + [\text{Akt-PIP3}]) \quad (\text{S3.96})$$

$$V_{41} = k_{41} \cdot ([\text{pAkt-PIP3}] \cdot [\text{PP2A}] - K_{d,41} \cdot [\text{ppAkt-PIP3-PP2A}]) \quad (\text{S3.97})$$

$$V_{42} = k_{\text{cat},42} \cdot [\text{pAkt-PIP3-PP2A}] \quad (\text{S3.98})$$

$$V_{43} = k_{43} \cdot [\text{Akt-PIP3-PP2A}] \quad (\text{S3.99})$$

$$V_{44} = V_{\text{max},40} \cdot [\text{pAkt-PIP3}] / (K_{m,40} + [\text{pAkt-PIP3}]) \quad (\text{S3.100})$$

$$V_{45} = k_{45} \cdot ([\text{ppAkt-PIP3}] \cdot [\text{PP2A}] - K_{d,45} \cdot [\text{ppAkt-PIP3-PP2A}]) \quad (\text{S3.101})$$

$$V_{46} = k_{\text{cat},46} \cdot [\text{ppAkt-PIP3-PP2A}] \quad (\text{S3.102})$$

$$V_{47} = k_{47} \cdot [\text{pAkt-PIP3-PP2A}] \quad (\text{S3.103})$$

$$V_{48} = k_{48} \cdot [\text{pE23H}] \quad (\text{S3.104})$$

$$V_{49} = k_{49} \cdot ([\text{2C4}] \cdot [\text{E2}] - K_{d,49} \cdot [\text{E2-2C4}]) \quad (\text{S3.105})$$

$$V_{50} = k_{50} \cdot [\text{E2-2C4}] - k_{50} \cdot [\text{E2-2C4}_c] \quad (\text{S3.106})$$

$$V_{51} = k_{51} \cdot [E3H] \quad (S3.107)$$

$$V_{52} = k_2 \cdot ([E3H_c] \cdot [E2] - K_{d,2} \cdot [E23H]) \quad (S3.108)$$

$$V_{53} = k_{53} \cdot [E23H] \quad (S3.109)$$

$$V_{54} = k_3 \cdot ([E23H_c] - K_{d,3} \cdot [pE23H]) \quad (S3.110)$$

$$V_{55} = k_{55} \cdot [PI3K-PI] \quad (S3.111)$$

$$V_{56} = k_{56} \cdot [PI3K-PIP3] \quad (S3.112)$$

$$V_{57} = k_{57} \cdot ([PTEN] \cdot [bpV] - K_{d,57} \cdot [PTEN\_bpV]) \quad (S1.113)$$

$$V_{58} = k_{58} \cdot ([PI3K] \cdot [LY] - K_{d,58} \cdot [PI3K\_LY]) \quad (S3.114)$$

$$V_{59} = k_{59} \cdot ([E2] \cdot [E2] - K_{d,59} \cdot [E22]) \quad (S3.115)$$

$$V_{60} = k_3 \cdot [E22] / (K_{d,3} + [E22]) - V_{max,4} [pE22] / (K_{m,4} + [pE22]) \quad (S3.116)$$

$$V_{61} = k_5 \cdot (2 \cdot [pE22] \cdot [Shc] - K_{d,5} \cdot [pE22-Shc]) \quad (S3.117)$$

$$V_{62} = k_6 \cdot [pE22-Shc] / (K_{d,6} + [pE22-Shc]) \quad (S3.118)$$

$$V_{63} = k_7 \cdot ([pE22-pShc][GS] - K_{d,7} [pE22-pShc-GS]) \quad (S3.119)$$

$$V_{64} = k_8 \cdot ([pE22-pShc-GS] - K_{d,8} [pE22-Per][Shc-GS]) \quad (S3.120)$$

$$V_{65} = k_{60} \cdot ([Tr] \cdot [E2] - K_{d,60} \cdot [E2-Tr]) \quad (S3.121)$$

$$V_{66} = k_2 \cdot ([E3H] \cdot [E2-Tr] - K_{d,2} \cdot [E23H-Tr]) \quad (S3.122)$$

$$V_{67} = k_3 \cdot [E23-Tr] / (K_{d,3} + [E23-Tr]) - V_{max,4} [pE23-Tr] / (K_{m,4} + [pE23-Tr]) \quad (S3.123)$$

$$V_{68} = k_5 \cdot ([pE23H-Tr] \cdot [Shc] - K_{d,5} \cdot [pE23H-Tr-Shc]) \quad (S3.124)$$

$$V_{69} = k_6 \cdot [pE23H-Tr-Shc] / (K_{d,6} + [pE23H-Tr-Shc]) \quad (S3.125)$$

$$V_{70} = k_7 \cdot ([pE23H-pShc-Tr] \cdot [GS] - K_{d,7} \cdot [pE23H-Tr-pShc-GS]) \quad (S3.126)$$

$$V_{71} = k_8 \cdot ([pE23H-Tr-pShc-GS] - K_{d,8} [pE23H-Tr][Shc-GS]) \quad (S3.127)$$

$$V_{72} = k_{59} \cdot ([E2] \cdot [E2-Per] - K_{d,59} \cdot [E22-Per]) \quad (S3.128)$$

$$V_{73} = k_3 \cdot [E22-Per] / (K_{d,3} + [E22-Per]) - V_{max,4} [pE22-Per] / (K_{m,4} + [pE22-Per]) \quad (S3.129)$$

$$V_{74} = k_5 \cdot (2 [\text{pE22-Per}] \cdot [\text{Shc}] - K_{d,5} \cdot [\text{pE22-Per-Shc}]) \quad (\text{S3.130})$$

$$V_{75} = k_6 \cdot [\text{pE22-Per-Shc}] / (K_{d,6} + [\text{pE22-Per-Shc}]) \quad (\text{S3.131})$$

$$V_{76} = k_7 \cdot ([\text{pE22-Per-pShc}][\text{GS}] - K_{d,7}[\text{pE22-Per-pShc-GS}]) \quad (\text{S3.132})$$

$$V_{77} = k_8 \cdot ([\text{pE22-Per-pShc-GS}] - K_{d,8}[\text{pE22-Per}][\text{Shc-GS}]) \quad (\text{S3.133})$$

$$V_{78} = k_{59} \cdot ([\text{E2-Per}] \cdot [\text{E2\_Per}] - K_{d,59} \cdot [\text{E22-Per2}]) \quad (\text{S3.134})$$

$$V_{79} = k_3 \cdot [\text{E22-Per2}] / (K_{d,3} + [\text{E22-Per2}]) -- V_{\max,4} [\text{pE22-Per2}] / (K_{m,4} + [\text{pE22-Per2}]) \quad (\text{S3.135})$$

$$V_{80} = k_5 \cdot (2 \cdot [\text{pE22-Per2}] \cdot [\text{Shc}] - K_{d,5} \cdot [\text{pE22-Per2-Shc}]) \quad (\text{S3.136})$$

$$V_{81} = k_6 \cdot [\text{pE22-Per-Shc}] / (K_{d,6} + [\text{pE22-Per-Shc}]) \quad (\text{S3.137})$$

$$V_{82} = k_7 \cdot ([\text{pE22-Per2-pShc}][\text{GS}] - K_{d,7}[\text{pE22-Per2-pShc-GS}]) \quad (\text{S3.138})$$

$$V_{83} = k_8 \cdot ([\text{pE22-Per2-pShc-GS}] - K_{d,8}[\text{pE22-Per2}][\text{Shc-GS}]) \quad (\text{S3.139})$$

$$V_{84} = k_{27} \cdot ([\text{pE23H-Tr}] \cdot [\text{PI3K}] - K_{d,27} \cdot [\text{pE23H-Tr-PI3K}]) \quad (\text{S3.140})$$

$$V_{85} = k_5 \cdot ([\text{E2}] \cdot [\text{Per}] - K_{d,5} \cdot [\text{E2-Per}]) \quad (\text{S3.141})$$

$$V_{86} = k_5 \cdot ([\text{E2-Tr}] \cdot [\text{Per}] - K_{d,5} \cdot [\text{E2-Tr-Per}]) \quad (\text{S3.142})$$



**Table 1.** Abbreviations used in the model

| Abbreviations in ODEs | Protein names                                            |
|-----------------------|----------------------------------------------------------|
| E2                    | ErbB2 (HER2) receptor                                    |
| E3                    | ErbB3 (HER3) receptor                                    |
| HRG                   | Heregulin                                                |
| E3H                   | ErbB3/HRG ligand/receptor complex                        |
| E3H <sub>c</sub>      | ErbB3/HRG ligand/receptor complex                        |
| E23H                  | Heterodimer of ErbB3/HRG with ErbB2                      |
| E23H <sub>c</sub>     | Heterodimer of ErbB3/HRG with ErbB2                      |
| pE23H, pHER2          | Phosphorylated heterodimer of ErbB3/HRG with ErbB2       |
| Grb2                  | growth factor receptor-binding protein 2                 |
| Ras-GDP               | Ras-GDP protein                                          |
| Ras-GTP               | Ras-GTP protein                                          |
| Raf                   | Raf protein                                              |
| Raf                   | Activated Raf                                            |
| PTEN                  | Phosphatase and tensin homolog deleted on chromosome ten |
| pPTEN                 | Phosphorylated PTEN                                      |
| AKT                   | AKT protein                                              |
| 2C4                   | Pertuzumab                                               |
| MAPK                  | Mitogen-activated protein kinase                         |
| MEK                   | MAPK/ERK kinase                                          |
| pMEK                  | Phosphorylated MEK                                       |
| ppMEK                 | Doubly phosphorylated MEK                                |
| ERK                   | extracellular signal-regulated kinase                    |
| pERK                  | Phosphorylated ERK                                       |
| ppERK                 | Doubly phosphorylated ERK                                |
| MKP3                  | MAPK phosphatase 3                                       |
| PDK1                  | 3-phosphoinositide-dependent kinase 1                    |
| PI                    | Phosphatidylinositol                                     |
| PIP3                  | phosphatidylinositol-3,4,5-trisphosphate                 |
| PI3K                  | phosphatidylinositol 3'-kinase                           |
| PI3K                  | Activated PI3K                                           |
| PP2A                  | protein phosphatase 2A                                   |
| Shc                   | Src homology and collagen domain protein                 |
| pShc                  | Phosphorylated Shc                                       |
| Sos                   | Son of Sevenless homolog protein                         |
| GS                    | Grb2–Sos complex                                         |
| pE23H–Shc             | Complex of pE23H with Shc                                |
| pE23H–pShc            | Complex of pE23H with pShc                               |
| Shc–GS                | Complex of Shc with GS                                   |
| pE23H–pShc–GS         | Complex of pE23H–pShc with GS                            |
| AKT–PIP3              | Complex of AKT with PIP3                                 |
| pAKT–PIP3             | Complex of pAKT with PIP3                                |
| ppAKT–PIP3            | Complex of ppAKT with PIP3                               |

Table 1. Cont.

| Abbreviations in ODEs | Protein names                                        |
|-----------------------|------------------------------------------------------|
| ppAKT-PIP3-PP2A       | Complex of ppAKT-PIP3 with PP2A                      |
| AKT-PIP3-PP2A         | Complex of AKT-PIP3 with PP2A                        |
| pAKT-PIP3-PP2A        | Complex of pAKT-PIP3 with PP2A                       |
| E2-2C4                | Complex of E2 with 2C4                               |
| E2-2C4 <sub>c</sub>   | Complex of E2 with 2C4                               |
| PTEN-PTEN             | Complex of PTEN with PTEN                            |
| pPTEN-PTEN            | Complex of pPTEN with PTEN                           |
| PTEN-PIP3             | Complex of PTEN with PIP3                            |
| PTEN-PI               | Complex of PTEN with PI                              |
| pMEKP-PP2A            | Complex of pMEKP with PP2A                           |
| MEK-PP2A              | Complex of MEK with PP2A                             |
| ppMEKPP-PP2A          | Complex of ppMEKPP with PP2A                         |
| pE23H-PI3K            | Complex of pE23H with PI3K                           |
| PI3K -PI              | Complex of PI3K with PI                              |
| pE23H-PI3K            | Complex of pE23H with PI3K                           |
| E <sub>Raf</sub>      | Phosphatase dephosphorylating Raf                    |
| bpV                   | Bisperoxovanadium compound, bpV(pic), PTEN inhibitor |
| LY                    | LY294002, PI3K inhibitor                             |
| PTEN-bpV              | Enzyme-inhibitor complex of PTEN and bpV(pic)        |
| PI3K-LY               | Enzyme-inhibitor complex of PI3K and LY294002        |
| E22                   | HER2 homodimer                                       |
| E2-Tr                 | HER2-trastuzumab complex                             |
| E2-Per                | HER2-pertuzumab complex                              |
| E22-Per2              | HER2-pertuzumab- HER2-pertuzumab complex             |
| E2-Tr-Per             | HER2-pertuzumab- HER2- trastuzumab complex           |

**Table 2.** Kinetic parameters of the model.  $k_i$ ,  $k_{-i}$ —rate constants of forward and reverse reactions ( $\text{nM}^{-1} \text{min}^{-1}$ ,  $\text{min}^{-1}$ );  $K_{d,i}$ ,  $K_{m,i}$ —dissociation and Michaelis constants (nM).

| Reaction Rate                                      | Kinetic Parameters | Values in Our Model    | Remarks    | Values from [1] | Values from [2] |
|----------------------------------------------------|--------------------|------------------------|------------|-----------------|-----------------|
| <b>HER3 and HER2 binding</b>                       |                    |                        |            |                 |                 |
| $V_1$                                              | $k_1$              | 0.005                  | estimation | 0.001           | 0.003           |
|                                                    | $K_{d,1}$          | 600; 0.2 <sup>1)</sup> | estimation | 0.6             | 20              |
| $V_{51}$                                           | $k_{51}$           | 0.01                   | estimation |                 |                 |
| $V_2$                                              | $k_2$              | 10                     | estimation | 0.01            | 0.01            |
| $V_{52}$                                           | $K_{d,2}$          | 10                     | estimation | 10              | 10              |
| $V_{53}$                                           | $k_{53}$           | 0.01                   | estimation |                 |                 |
| $V_3$                                              | $k_3$              | 1                      | estimation | 1               | 1               |
|                                                    | $K_{d,3}$          | 0.1                    | estimation | 0.01            | 0.01            |
| $V_4$                                              | $V_{max,4}$        | 10                     | estimation | 62              | 450             |
|                                                    | $K_{m,4}$          | 50                     | estimation | 50              | 50              |
| <b>Shc and GS binding</b>                          |                    |                        |            |                 |                 |
| $V_5$                                              | $k_5$              | 0.06                   | estimation | 0.1             | 0.09            |
|                                                    | $K_{d,5}$          | 1                      | estimation | 1               | 6               |
| $V_6$                                              | $k_6$              | 12                     | estimation | 20              | 6               |
|                                                    | $K_{d,6}$          | 3                      | estimation | 5               | 0.06            |
| $V_7$                                              | $k_7$              | 36                     | estimation | 60              | 0.009           |
|                                                    | $K_{d,7}$          | 9                      | estimation | 9               | 4.3             |
| $V_8$                                              | $k_8$              | 12                     | estimation | 2040            | 0.12            |
|                                                    | $K_{d,8}$          | 0.1                    | estimation | 7.8             | 0.002           |
| $V_9$                                              | $k_9$              | 35                     | estimation | 40.8            | 0.1             |
|                                                    | $k_{-9}$           | 0                      | estimation | 0               | 0.2             |
| $V_{10}$                                           | $V_{max,10}$       | 0.0154                 | estimation | 0.0154          | 1.7             |
|                                                    | $K_{m,10}$         | 340                    | estimation | 340             | 340             |
| <b>E23HP binding with PI3K and PI3K activation</b> |                    |                        |            |                 |                 |
| $V_{27}$                                           | $k_{27}$           | 3                      | estimation | 0.1             |                 |
|                                                    | $K_{d,27}$         | 1                      | estimation | 20              |                 |
| $V_{28}$                                           | $k_{28}$           | 300                    | estimation | 9.85            |                 |
|                                                    | $k_{-28}$          | 0                      | estimation | 0.1             |                 |
| $V_{29}$                                           | $k_{29}$           | 13500                  | estimation | 45.8            |                 |
|                                                    | $k_{-29}$          | 0                      | estimation | 0.047           |                 |
| $V_{30}$                                           | $V_{30}$           | 900                    | estimation | $V_{m,26}=2620$ |                 |

Table 2. Cont.

| Reaction Rate                  | Kinetic Parameters | Values in Our Model | Remarks    | Values from [1]     | Values from [2] |
|--------------------------------|--------------------|---------------------|------------|---------------------|-----------------|
| <b>Ras/Raf/MEK/ERK cascade</b> |                    |                     |            |                     |                 |
| $V_{11}$                       | $k_{11}$           | 6                   | estimation | 0.22                |                 |
|                                | $K_{m,11}$         | 0.18                | estimation | 0.18                |                 |
| $V_{12}$                       | $V_{max,12}$       | 3                   | estimation | 0.3                 |                 |
|                                | $K_{m,12}$         | 0.1                 | estimation | 0.06                |                 |
| $V_{13}$                       | $k_{13}$           | 1                   | estimation | 1.53                |                 |
|                                | $K_{m,13}$         | 11.7                | estimation | 11.7                |                 |
| $V_{14}$                       | $k_{14}$           | 0.6                 | estimation | $6.7 \cdot 10^{-3}$ |                 |
|                                | $K_{m,14}$         | 30                  | estimation | 8                   |                 |
| $V_{15} V_{19}$                | $k_{15}$           | 2.1                 | estimation | 3.5                 |                 |
|                                | $K_{m,15}$         | 1                   | estimation | 317                 |                 |
| $V_{16}$                       | $k_{16}$           | 0.06                | estimation |                     |                 |
| $V_{17}, V_{21}$               | $k_{cat,16}$       | 0.6                 | estimation |                     |                 |
| $V_{18}$                       | $k_{18}$           | 3                   | estimation |                     |                 |
| $V_{20}$                       | $k_{16}$           | 0.06                | estimation |                     |                 |
|                                | $K_{d,16}$         | 1                   | estimation |                     |                 |
| $V_{22}$                       | $k_{22}$           | 0.06                | estimation |                     |                 |
| $V_{23} V_{25}$                | $k_{23}$           | 1.2                 | estimation | 9.5                 |                 |
|                                | $K_{m,23}$         | 10                  | estimation | $1.4 \cdot 10^5$    |                 |
| $V_{24} V_{26}$                | $V_{max,24}$       | 1.8                 | estimation | 0.3                 |                 |
|                                | $K_{m,24}$         | 10                  | estimation | 160                 |                 |
| <b>PIP3 → PI</b>               |                    |                     |            |                     |                 |
| $V_{31}$                       | $k_{31}$           | 0.03                | estimation |                     |                 |
|                                | $K_{d,31}$         | 140                 | estimation | $K_m=40$            |                 |
| $V_{55}$                       | $k_{55}$           | 30                  | estimation | $k_{27}=16.9$       |                 |
| $V_{56}$                       | $k_{56}$           | 30                  | estimation |                     |                 |
| $V_{32}$                       | $k_{32}$           | 8000                | estimation |                     |                 |
|                                | $K_{d,32}$         | 0.01                | estimation | $K_{m,28}=9$        |                 |
| $V_{33}$                       | $k_{33}$           | 15±5                | estimation |                     |                 |
| $V_{34}$                       | $k_{34}$           | 3.6                 | estimation |                     |                 |
| <b>PTEN → pPTEN</b>            |                    |                     |            |                     |                 |
| $V_{35}$                       | $V_{max,35}$       | 150                 | estimation |                     |                 |
|                                | $K_{m,35}$         | 2                   | estimation |                     |                 |
| $V_{36}$                       | $k_{36}$           | 1                   | estimation |                     |                 |
|                                | $K_{d,36}$         | 2.2                 | estimation |                     |                 |
| $V_{37}$                       | $k_{37}$           | 150                 | estimation |                     |                 |
| $V_{38}$                       | $k_{38}$           | 150                 | estimation |                     |                 |

Table 2. Cont.

| Reaction Rate                        | Kinetic Parameters | Values in Our Model    | Remarks                           | Values from [1] | Values from [2] |
|--------------------------------------|--------------------|------------------------|-----------------------------------|-----------------|-----------------|
| <b>AKT activation pathway</b>        |                    |                        |                                   |                 |                 |
| $V_{39}$                             | $k_{39}$           | 15000                  | estimation                        | 507             |                 |
|                                      | $K_{d,39}$         | 20                     | estimation                        | 234             |                 |
| $V_{40}, V_{44}$                     | $V_{max,40}$       | $1.5 \cdot 10^4$       | estimation                        | $2 \cdot 10^4$  |                 |
|                                      | $K_{m,40}$         | 0.1                    | estimation                        | $8 \cdot 10^4$  |                 |
| $V_{41}$                             | $k_{41}$           | 3                      | estimation                        |                 |                 |
| $V_{42}, V_{46}$                     | $k_{42}$           | 45                     | estimation                        |                 |                 |
| $V_{43}$                             | $k_{43}$           | 30                     | estimation                        |                 |                 |
| $V_{45}$                             | $k_{41}$           | 3                      | estimation                        |                 |                 |
|                                      | $K_{d,41}$         | 0.1                    | estimation                        |                 |                 |
| $V_{47}$                             | $k_{47}$           | 0.3                    | estimation                        |                 |                 |
| <b>Receptor internalization</b>      |                    |                        |                                   |                 |                 |
| $V_{48}$                             | $k_{48}$           | 0.001                  | estimation                        | 0.001           |                 |
| <b>2C4 binding with HER2</b>         |                    |                        |                                   |                 |                 |
| $V_{49}$                             | $k_{49}$           | 0.003                  | estimation                        |                 |                 |
|                                      | $K_{d,49}$         | $2 \cdot 10^4; 7^{1)}$ | estimation,<br>$K_d=8.5$ nM [3]   |                 |                 |
| $V_{50}$                             | $k_{50}$           | 0.6                    | estimation                        |                 |                 |
|                                      | $k_{.50}$          | 0.012                  | estimation                        |                 |                 |
| <b>PTEN inhibition by bpV(pic)</b>   |                    |                        |                                   |                 |                 |
| $V_{57}$                             | $k_{57}$           | 100                    | estimation                        |                 |                 |
|                                      | $K_{d,57}$         | 10                     | estimation<br>$IC_{50}=31$ nM [4] |                 |                 |
| <b>PI3K inhibition by LY294002</b>   |                    |                        |                                   |                 |                 |
| $V_{58}$                             | $k_{58}$           | 100                    | estimation                        |                 |                 |
|                                      | $K_{d,58}$         | 80                     | estimation,<br>$K_i=1600$ nM [5]  |                 |                 |
| <b>HER2 homodimerisation</b>         |                    |                        |                                   |                 |                 |
| $V_{59}$                             | $k_{59}$           | 1                      | estimation                        |                 |                 |
|                                      | $K_{d,59}$         | 100                    | estimation                        |                 |                 |
| <b>Trastuzumab binding with HER2</b> |                    |                        |                                   |                 |                 |
| $V_{65}$                             | $k_{60}$           | 0.003                  |                                   |                 |                 |
|                                      | $K_{d,60}$         | $2 \cdot 10^4; 7^{1)}$ |                                   |                 |                 |

<sup>1)</sup> the value of the parameters after rescaling of HRG and 2C4, trastuzumab concentrations to extracellular volume [2].

**Table 3.** Initial concentrations of the metabolites in the model, nM.

| Species          | Values in the model                      | Remarks    | Values in the model [1] | Values in the model [2] |
|------------------|------------------------------------------|------------|-------------------------|-------------------------|
| HER3             | 80                                       | estimation | HER4 = 80               | EGFR = 100              |
| HER2             | 50 for MCF7 cells<br>800 for SKOV3 cells | estimation |                         |                         |
| HRG              | 100                                      | estimation | 100                     |                         |
| Shc              | 100                                      | estimation | 100                     | 150                     |
| GS               | 100                                      | estimation | 10                      |                         |
| RasGDP           | 120                                      | estimation | 120                     |                         |
| Raf              | 100                                      | estimation | 100                     |                         |
| E <sub>Raf</sub> | 7                                        | estimation | 7                       |                         |
| MEK              | 100                                      | estimation | 120                     |                         |
| ERK              | 100                                      | estimation | 1000                    |                         |
| PI3K             | 200                                      | estimation | 10                      |                         |
| AKT              | 100                                      | estimation | 10                      |                         |
| PP2A             | 10                                       | estimation | 11.4                    |                         |
| PI               | 300                                      | estimation | 800                     |                         |
| PTEN             | 50                                       | estimation |                         |                         |

## References

1. Hatakeyama, M.; Kimura, S.; Naka, T.; Kawasaki, T.; Yumoto, N.; Ichikawa, M.; Kim, J.H.; Saito, K.; Saeki, M.; Shirouzu, M.; *et al.* A computational model on the modulation of mitogen-activated protein kinase (MAPK) and Akt pathways in heregulin-induced ErbB signalling. *Biochem. J.* **2003**, *373*, 451–463.
2. Kholodenko, B.N.; Demin, O.V.; Moehren, G.; Hoek, J.B. Quantification of short term signaling by the epidermal growth factor receptor. *J. Biol. Chem.* **1999**, *274*, 30169–30181.
3. Adams, C.W.; Allison, D.E.; Flagella, K.; Presta, L.; Clarke, J.; Dybdal, N.; McKeever, K.; Sliwkowski, M.X. Humanization of a recombinant monoclonal antibody to produce a therapeutic HER dimerization inhibitor, pertuzumab. *Cancer Immunol. Immunother.* **2006**, *55*, 717–727.
4. Schmid, A.C.; Byrne, R.D.; Vilar, R.; Woscholski, R. Bisperoxovanadium compounds are potent PTEN inhibitors. *FEBS Lett.* **2004**, *566*, 35–38.
5. Vlahos, C.J.; Matter, W.F.; Hui, K.Y.; Brown, R.F. A specific inhibitor of phosphatidylinositol 3-kinase, 2-(4-morpholinyl)-8-phenyl-4H-1-benzopyran-4-one (LY294002). *J. Biol. Chem.* **1994**, *269*, 5241–5248.
