# Supplementary material for: Systems Analysis of Drug-Induced Receptor Tyrosine Kinase Reprogramming Following Targeted Mono- and Combination Anti-Cancer Therapy
Source: Cells. 2014 Jun 10;3(2):563–91. doi: 10.3390/cells3020563 (PMC4092865; doi:10.3390/cells3020563)
Supplement: Supplementary File 1 — Supplementary (XLS, 152 KB) [file cells-03-00563-s001.xls]

## Sheet: GeneNames
HGNC ID	Approved Symbol	Approved Name	Entrez Gene ID(supplied by NCBI)
391	AKT1	v-akt murine thymoma viral oncogene homolog 1	207
392	AKT2	v-akt murine thymoma viral oncogene homolog 2	208
393	AKT3	v-akt murine thymoma viral oncogene homolog 3	10000
484	ANGPT1	angiopoietin 1	284
485	ANGPT2	angiopoietin 2	285
487	ANGPT4	angiopoietin 4	51378
600	APOA1	apolipoprotein A-I	335
601	APOA2	apolipoprotein A-II	336
602	APOA4	apolipoprotein A-IV	337
603	APOB	apolipoprotein B	338
604	APOBEC1	apolipoprotein B mRNA editing enzyme, catalytic polypeptide 1	339
605	APOBEC2	apolipoprotein B mRNA editing enzyme, catalytic polypeptide-like 2	10930
607	APOC1	apolipoprotein C-I	341
609	APOC2	apolipoprotein C-II	344
610	APOC3	apolipoprotein C-III	345
611	APOC4	apolipoprotein C-IV	346
612	APOD	apolipoprotein D	347
613	APOE	apolipoprotein E	348
615	APOF	apolipoprotein F	319
616	APOH	apolipoprotein H (beta-2-glycoprotein I)	350
618	APOL1	apolipoprotein L, 1	8542
619	APOL2	apolipoprotein L, 2	23780
646	ARAF	v-raf murine sarcoma 3611 viral oncogene homolog	369
651	AREG	amphiregulin	374
786	ATF4	activating transcription factor 4	468
978	BCCIP	BRCA2 and CDKN1A interacting protein	56647
994	BCL2L11	BCL2-like 11 (apoptosis facilitator)	10018
1001	BCL6	B-cell CLL/lymphoma 6	604
1033	BDNF	brain-derived neurotrophic factor	627
1097	BRAF	v-raf murine sarcoma viral oncogene homolog B	673
1106	BRE	brain and reproductive organ-expressed (TNFRSF1A modulator)	9577
1121	BTC	betacellulin	685
1388	CACNA1A	calcium channel, voltage-dependent, P/Q type, alpha 1A subunit	773
1389	CACNA1B	calcium channel, voltage-dependent, N type, alpha 1B subunit	774
1390	CACNA1C	calcium channel, voltage-dependent, L type, alpha 1C subunit	775
1391	CACNA1D	calcium channel, voltage-dependent, L type, alpha 1D subunit	776
1392	CACNA1E	calcium channel, voltage-dependent, R type, alpha 1E subunit	777
1393	CACNA1F	calcium channel, voltage-dependent, L type, alpha 1F subunit	778
1394	CACNA1G	calcium channel, voltage-dependent, T type, alpha 1G subunit	8913
1395	CACNA1H	calcium channel, voltage-dependent, T type, alpha 1H subunit	8912
1396	CACNA1I	calcium channel, voltage-dependent, T type, alpha 1I subunit	8911
1397	CACNA1S	calcium channel, voltage-dependent, L type, alpha 1S subunit	779
1399	CACNA2D1	calcium channel, voltage-dependent, alpha 2/delta subunit 1	781
1400	CACNA2D2	calcium channel, voltage-dependent, alpha 2/delta subunit 2	9254
1401	CACNB1	calcium channel, voltage-dependent, beta 1 subunit	782
1402	CACNB2	calcium channel, voltage-dependent, beta 2 subunit	783
1403	CACNB3	calcium channel, voltage-dependent, beta 3 subunit	784
1404	CACNB4	calcium channel, voltage-dependent, beta 4 subunit	785
1405	CACNG1	calcium channel, voltage-dependent, gamma subunit 1	786
1406	CACNG2	calcium channel, voltage-dependent, gamma subunit 2	10369
1407	CACNG3	calcium channel, voltage-dependent, gamma subunit 3	10368
1408	CACNG4	calcium channel, voltage-dependent, gamma subunit 4	27092
1409	CACNG5	calcium channel, voltage-dependent, gamma subunit 5	27091
1593	CCNG2	cyclin G2	901
1633	CD19	CD19 molecule	930
1781	CDKL1	cyclin-dependent kinase-like 1 (CDC2-related kinase)	8814
1782	CDKL2	cyclin-dependent kinase-like 2 (CDC2-related kinase)	8999
1784	CDKN1A	cyclin-dependent kinase inhibitor 1A (p21, Cip1)	1026
1785	CDKN1B	cyclin-dependent kinase inhibitor 1B (p27, Kip1)	1027
1787	CDKN2A	cyclin-dependent kinase inhibitor 2A	1029
1850	CELSR1	cadherin, EGF LAG seven-pass G-type receptor 1	9620
1909	CHAD	chondroadherin	1101
2432	CSF1	colony stimulating factor 1 (macrophage)	1435
2433	CSF1R	colony stimulating factor 1 receptor	1436
2438	CSF3	colony stimulating factor 3 (granulocyte)	1440
2439	CSF3R	colony stimulating factor 3 receptor (granulocyte)	1441
2651	CYP7A1	cytochrome P450, family 7, subfamily A, polypeptide 1	1581
3059	HBEGF	heparin-binding EGF-like growth factor	1839
3064	DUSP1	dual specificity phosphatase 1	1843
3068	DUSP2	dual specificity phosphatase 2	1844
3069	DUSP3	dual specificity phosphatase 3	1845
3070	DUSP4	dual specificity phosphatase 4	1846
3071	DUSP5	dual specificity phosphatase 5	1847
3072	DUSP6	dual specificity phosphatase 6	1848
3113	E2F1	E2F transcription factor 1	1869
3173	EDIL3	EGF-like repeats and discoidin I-like domains 3	10085
3218	EFEMP1	EGF containing fibulin-like extracellular matrix protein 1	2202
3219	EFEMP2	EGF containing fibulin-like extracellular matrix protein 2	30008
3229	EGF	epidermal growth factor	1950
3230	CELSR3	cadherin, EGF LAG seven-pass G-type receptor 3	1951
3231	CELSR2	cadherin, EGF LAG seven-pass G-type receptor 2	1952
3232	MEGF6	multiple EGF-like-domains 6	1953
3233	MEGF8	multiple EGF-like-domains 8	1954
3234	MEGF9	multiple EGF-like-domains 9	1955
3235	EGFL6	EGF-like-domain, multiple 6	25975
3236	EGFR	epidermal growth factor receptor	1956
3321	ELK1	ELK1, member of ETS oncogene family	2002
3325	ELK3	ELK3, ETS-domain protein (SRF accessory protein 2)	2004
3326	ELK4	ELK4, ETS-domain protein (SRF accessory protein 1)	2005
3386	EPHA2	EPH receptor A2	1969
3415	EPO	erythropoietin	2056
3416	EPOR	erythropoietin receptor	2057
3430	ERBB2	v-erb-b2 avian erythroblastic leukemia viral oncogene homolog 2	2064
3431	ERBB3	v-erb-b2 avian erythroblastic leukemia viral oncogene homolog 3	2065
3432	ERBB4	v-erb-b2 avian erythroblastic leukemia viral oncogene homolog 4	2066
3443	EREG	epiregulin	2069
3688	FGFR1	fibroblast growth factor receptor 1	2260
3689	FGFR2	fibroblast growth factor receptor 2	2263
3690	FGFR3	fibroblast growth factor receptor 3	2261
3691	FGFR4	fibroblast growth factor receptor 4	2264
3763	FLT1	fms-related tyrosine kinase 1	2321
3767	FLT4	fms-related tyrosine kinase 4	2324
3796	FOS	FBJ murine osteosarcoma viral oncogene homolog	2353
3797	FOSB	FBJ murine osteosarcoma viral oncogene homolog B	2354
3798	FOSL2	FOS-like antigen 2	2355
3819	FOXO1	forkhead box O1	2308
3821	FOXO3	forkhead box O3	2309
4037	FYN	FYN oncogene related to SRC, FGR, YES	2534
4066	GAB1	GRB2-associated binding protein 1	2549
4263	GHR	growth hormone receptor	2690
4380	GNA12	guanine nucleotide binding protein (G protein) alpha 12	2768
4553	GPX1	glutathione peroxidase 1	2876
4554	GPX2	glutathione peroxidase 2 (gastrointestinal)	2877
4555	GPX3	glutathione peroxidase 3 (plasma)	2878
4556	GPX4	glutathione peroxidase 4	2879
4557	GPX5	glutathione peroxidase 5 (epididymal androgen-related protein)	2880
4558	GPX6	glutathione peroxidase 6 (olfactory)	257202
4559	GPX7	glutathione peroxidase 7	2882
4562	GRAP	GRB2-related adaptor protein	10750
4563	GRAP2	GRB2-related adaptor protein 2	9402
4566	GRB2	growth factor receptor-bound protein 2	2885
4616	GSK3A	glycogen synthase kinase 3 alpha	2931
4617	GSK3B	glycogen synthase kinase 3 beta	2932
4893	HGF	hepatocyte growth factor (hepapoietin A; scatter factor)	3082
4894	HGFAC	HGF activator	3083
4897	HGS	hepatocyte growth factor-regulated tyrosine kinase substrate	9146
5173	HRAS	Harvey rat sarcoma viral oncogene homolog	3265
5174	ERAS	ES cell expressed Ras	3266
5232	HSPA1A	heat shock 70kDa protein 1A	3303
5233	HSPA1B	heat shock 70kDa protein 1B	3304
5246	HSPB1	heat shock 27kDa protein 1	3315
5432	IFNAR1	interferon (alpha, beta and omega) receptor 1	3454
5433	IFNAR2	interferon (alpha, beta and omega) receptor 2	3455
5464	IGF1	insulin-like growth factor 1 (somatomedin C)	3479
5465	IGF1R	insulin-like growth factor 1 receptor	3480
5991	IL1A	interleukin 1, alpha	3552
5992	IL1B	interleukin 1, beta	3553
5993	IL1R1	interleukin 1 receptor, type I	3554
5994	IL1R2	interleukin 1 receptor, type II	7850
6001	IL2	interleukin 2	3558
6008	IL2RA	interleukin 2 receptor, alpha	3559
6009	IL2RB	interleukin 2 receptor, beta	3560
6010	IL2RG	interleukin 2 receptor, gamma	3561
6011	IL3	interleukin 3 (colony-stimulating factor, multiple)	3562
6012	IL3RA	interleukin 3 receptor, alpha (low affinity)	3563
6014	IL4	interleukin 4	3565
6015	IL4R	interleukin 4 receptor	3566
6018	IL6	interleukin 6 (interferon, beta 2)	3569
6019	IL6R	interleukin 6 receptor	3570
6023	IL7	interleukin 7	3574
6024	IL7R	interleukin 7 receptor	3575
6081	INS	insulin	3630
6091	INSR	insulin receptor	3643
6125	IRS1	insulin receptor substrate 1	3667
6126	IRS2	insulin receptor substrate 2	8660
6164	ITGBL1	integrin, beta-like 1 (with EGF-like repeat domains)	9358
6171	ITK	IL2-inducible T-cell kinase	3702
6190	JAK1	Janus kinase 1	3716
6192	JAK2	Janus kinase 2	3717
6193	JAK3	Janus kinase 3	3718
6204	JUN	jun proto-oncogene	3725
6205	JUNB	jun B proto-oncogene	3726
6206	JUND	jun D proto-oncogene	3727
6307	KDR	kinase insert domain receptor (a type III receptor tyrosine kinase)	3791
6342	KIT	v-kit Hardy-Zuckerman 4 feline sarcoma viral oncogene homolog	3815
6343	KITLG	KIT ligand	4254
6407	KRAS	Kirsten rat sarcoma viral oncogene homolog	3845
6484	LAMA4	laminin, alpha 4	3910
6486	LAMB1	laminin, beta 1	3912
6487	LAMB2	laminin, beta 2 (laminin S)	3913
6490	LAMB3	laminin, beta 3	3914
6491	LAMB4	laminin, beta 4	22798
6492	LAMC1	laminin, gamma 1 (formerly LAMB2)	3915
6493	LAMC2	laminin, gamma 2	3918
6494	LAMC3	laminin, gamma 3	10319
6510	STMN1	stathmin 1	3925
6840	MAP2K1	mitogen-activated protein kinase kinase 1	5604
6842	MAP2K2	mitogen-activated protein kinase kinase 2	5605
6871	MAPK1	mitogen-activated protein kinase 1	5594
6872	MAPK10	mitogen-activated protein kinase 10	5602
6877	MAPK3	mitogen-activated protein kinase 3	5595
6878	MAPK4	mitogen-activated protein kinase 4	5596
6879	MAPK6	mitogen-activated protein kinase 6	5597
6881	MAPK8	mitogen-activated protein kinase 8	5599
6886	MAPK9	mitogen-activated protein kinase 9	5601
6893	MAPT	microtubule-associated protein tau	4137
6913	MAX	MYC associated factor X	4149
6914	MAZ	MYC-associated zinc finger protein (purine-binding transcription factor)	4150
7029	MET	met proto-oncogene	4233
7036	MFGE8	milk fat globule-EGF factor 8 protein	4240
7128	MLH3	mutL homolog 3	27030
7139	FOXO4	forkhead box O4	4303
7199	MOS	v-mos Moloney murine sarcoma viral oncogene homolog	4342
7227	MRAS	muscle RAS oncogene homolog	22808
7553	MYC	v-myc avian myelocytomatosis viral oncogene homolog	4609
7554	MYCBP	MYC binding protein	26292
7765	NF1	neurofibromin 1	4763
7809	NGFR	nerve growth factor receptor	4804
7989	NRAS	neuroblastoma RAS viral (v-ras) oncogene homolog	4893
7997	NRG1	neuregulin 1	3084
7998	NRG2	neuregulin 2	9542
7999	NRG3	neuregulin 3	10718
8023	NTF3	neurotrophin 3	4908
8031	NTRK1	neurotrophic tyrosine kinase, receptor, type 1	4914
8032	NTRK2	neurotrophic tyrosine kinase, receptor, type 2	4915
8506	OSM	oncostatin M	5008
8507	OSMR	oncostatin M receptor	9180
8799	PDGFA	platelet-derived growth factor alpha polypeptide	5154
8800	PDGFB	platelet-derived growth factor beta polypeptide	5155
8803	PDGFRA	platelet-derived growth factor receptor, alpha polypeptide	5156
8804	PDGFRB	platelet-derived growth factor receptor, beta polypeptide	5159
8809	PDK1	pyruvate dehydrogenase kinase, isozyme 1	5163
8810	PDK2	pyruvate dehydrogenase kinase, isozyme 2	5164
8811	PDK3	pyruvate dehydrogenase kinase, isozyme 3	5165
8812	PDK4	pyruvate dehydrogenase kinase, isozyme 4	5166
8893	PGF	placental growth factor	5228
8971	PIK3C2A	phosphatidylinositol-4-phosphate 3-kinase, catalytic subunit type 2 alpha	5286
8972	PIK3C2B	phosphatidylinositol-4-phosphate 3-kinase, catalytic subunit type 2 beta	5287
8973	PIK3C2G	phosphatidylinositol-4-phosphate 3-kinase, catalytic subunit type 2 gamma	5288
8974	PIK3C3	phosphatidylinositol 3-kinase, catalytic subunit type 3	5289
8975	PIK3CA	phosphatidylinositol-4,5-bisphosphate 3-kinase, catalytic subunit alpha	5290
8976	PIK3CB	phosphatidylinositol-4,5-bisphosphate 3-kinase, catalytic subunit beta	5291
8977	PIK3CD	phosphatidylinositol-4,5-bisphosphate 3-kinase, catalytic subunit delta	5293
8978	PIK3CG	phosphatidylinositol-4,5-bisphosphate 3-kinase, catalytic subunit gamma	5294
8979	PIK3R1	phosphoinositide-3-kinase, regulatory subunit 1 (alpha)	5295
8980	PIK3R2	phosphoinositide-3-kinase, regulatory subunit 2 (beta)	5296
8981	PIK3R3	phosphoinositide-3-kinase, regulatory subunit 3 (gamma)	8503
8982	PIK3R4	phosphoinositide-3-kinase, regulatory subunit 4	30849
9445	PRL	prolactin	5617
9446	PRLR	prolactin receptor	5618
9801	RAC1	ras-related C3 botulinum toxin substrate 1 (rho family, small GTP binding protein Rac1)	5879
9829	RAF1	v-raf-1 murine leukemia viral oncogene homolog 1	5894
9855	RAP1A	RAP1A, member of RAS oncogene family	5906
9856	RAP1AP	RAP1A, member of RAS oncogene family pseudogene	5907
9857	RAP1B	RAP1B, member of RAS oncogene family	5908
9871	RASA1	RAS p21 protein activator (GTPase activating protein) 1	5921
9872	RASA2	RAS p21 protein activator 2	5922
9875	RASGRF1	Ras protein-specific guanine nucleotide-releasing factor 1	5923
9876	RASGRF2	Ras protein-specific guanine nucleotide-releasing factor 2	5924
9878	RASGRP1	RAS guanyl releasing protein 1 (calcium and DAG-regulated)	10125
9879	RASGRP2	RAS guanyl releasing protein 2 (calcium and DAG-regulated)	10235
9957	RELN	reelin	5649
10447	RRAS	related RAS viral (r-ras) oncogene homolog	6237
10773	SFN	stratifin	2810
10830	SH3GL1	SH3-domain GRB2-like 1	6455
10831	SH3GL2	SH3-domain GRB2-like 2	6456
10832	SH3GL3	SH3-domain GRB2-like 3	6457
10833	SH3GLB1	SH3-domain GRB2-like endophilin B1	51100
10834	SH3GLB2	SH3-domain GRB2-like endophilin B2	56904
10835	SH3GL1P1	SH3-domain GRB2-like 1 pseudogene 1	6458
10836	SH3GL1P2	SH3-domain GRB2-like 1 pseudogene 2	6459
10837	SH3GL1P3	SH3-domain GRB2-like 1 pseudogene 3	727736
10840	SHC1	SHC (Src homology 2 domain containing) transforming protein 1	6464
10914	SLC12A6	solute carrier family 12 (potassium/chloride transporter), member 6	9990
11180	SOD2	superoxide dismutase 2, mitochondrial	6648
11187	SOS1	son of sevenless homolog 1 (Drosophila)	6654
11188	SOS2	son of sevenless homolog 2 (Drosophila)	6655
11283	SRC	v-src avian sarcoma (Schmidt-Ruppin A-2) viral oncogene homolog	6714
11291	SRF	serum response factor (c-fos serum response element-binding transcription factor)	6722
11491	SYK	spleen tyrosine kinase	6850
11724	TEK	TEK tyrosine kinase, endothelial	7010
11765	TGFA	transforming growth factor, alpha	7039
11766	TGFB1	transforming growth factor, beta 1	7040
11768	TGFB2	transforming growth factor, beta 2	7042
11769	TGFB3	transforming growth factor, beta 3	7043
11772	TGFBR1	transforming growth factor, beta receptor 1	7046
11773	TGFBR2	transforming growth factor, beta receptor II (70/80kDa)	7048
11785	THBS1	thrombospondin 1	7057
11803	TIAF1	TGFB1-induced anti-apoptotic factor 1	9220
11809	TIE1	tyrosine kinase with immunoglobulin-like and EGF-like domains 1	7075
11848	TLR2	toll-like receptor 2	7097
11850	TLR4	toll-like receptor 4	7099
11866	TMEFF1	transmembrane protein with EGF-like and two follistatin-like domains 1	8577
11867	TMEFF2	transmembrane protein with EGF-like and two follistatin-like domains 2	23671
11916	TNFRSF1A	tumor necrosis factor receptor superfamily, member 1A	7132
11936	FASLG	Fas ligand (TNF superfamily, member 6)	356
11979	TOB1	transducer of ERBB2, 1	10140
11980	TOB2	transducer of ERBB2, 2	10766
12030	TRADD	TNFRSF1A-associated via death domain	8717
12437	TXNRD1	thioredoxin reductase 1	7296
12657	VAV1	vav 1 guanine nucleotide exchange factor	7409
12659	VAV3	vav 3 guanine nucleotide exchange factor	10451
12680	VEGFA	vascular endothelial growth factor A	7422
12681	VEGFB	vascular endothelial growth factor B	7423
12849	YWHAB	tyrosine 3-monooxygenase/tryptophan 5-monooxygenase activation protein, beta	7529
12851	YWHAE	tyrosine 3-monooxygenase/tryptophan 5-monooxygenase activation protein, epsilon	7531
12852	YWHAG	tyrosine 3-monooxygenase/tryptophan 5-monooxygenase activation protein, gamma	7532
12853	YWHAH	tyrosine 3-monooxygenase/tryptophan 5-monooxygenase activation protein, eta	7533
12854	YWHAQ	tyrosine 3-monooxygenase/tryptophan 5-monooxygenase activation protein, theta	10971
12855	YWHAZ	tyrosine 3-monooxygenase/tryptophan 5-monooxygenase activation protein, zeta	7534
13291	GABARAPL2	GABA(A) receptor-associated protein-like 2	11345
13441	SCUBE1	signal peptide, CUB domain, EGF-like 1	80274
13625	CACNG6	calcium channel, voltage-dependent, gamma subunit 6	59285
13626	CACNG7	calcium channel, voltage-dependent, gamma subunit 7	59284
13628	CACNG8	calcium channel, voltage-dependent, gamma subunit 8	59283
13655	SCUBE3	signal peptide, CUB domain, EGF-like 3	222663
13718	FOSL1	FOS-like antigen 1	8061
13916	APOM	apolipoprotein M	55937
13944	EGFL8	EGF-like-domain, multiple 8	80864
13986	TOB2P1	transducer of ERBB2, 2 pseudogene 1	222699
14458	GAB2	GRB2-associated binding protein 2	9846
14545	RASGRP3	RAS guanyl releasing protein 3 (calcium and DAG-regulated)	25780
14630	CRELD1	cysteine-rich with EGF-like domains 1	78987
14634	PDAP1	PDGFA associated protein 1	11333
14867	APOL4	apolipoprotein L, 4	80832
14868	APOL3	apolipoprotein L, 3	80833
14869	APOL5	apolipoprotein L, 5	80831
14870	APOL6	apolipoprotein L, 6	80830
14906	NIN	ninein (GSK3B interacting protein)	51199
14922	HRASLS	HRAS-like suppressor	57110
15460	CACNA2D3	calcium channel, voltage-dependent, alpha 2/delta subunit 3	55799
15985	SVEP1	sushi, von Willebrand factor type A, EGF and pentraxin domain containing 1	79987
16710	AKTIP	AKT interacting protein	64400
16744	CIZ1	CDKN1A interacting zinc finger protein 1	25792
16753	PRDX6	peroxiredoxin 6	9588
17012	FGFR1OP	FGFR1 oncogene partner	11116
17271	RRAS2	related RAS viral (r-ras) oncogene homolog 2	22800
17288	APOA5	apolipoprotein A-V	116519
17343	APOBEC3A	apolipoprotein B mRNA editing enzyme, catalytic polypeptide-like 3A	200315
17352	APOBEC3B	apolipoprotein B mRNA editing enzyme, catalytic polypeptide-like 3B	9582
17353	APOBEC3C	apolipoprotein B mRNA editing enzyme, catalytic polypeptide-like 3C	27350
17354	APOBEC3D	apolipoprotein B mRNA editing enzyme, catalytic polypeptide-like 3D	140564
17356	APOBEC3F	apolipoprotein B mRNA editing enzyme, catalytic polypeptide-like 3F	200316
17357	APOBEC3G	apolipoprotein B mRNA editing enzyme, catalytic polypeptide-like 3G	60489
17360	LRIG1	leucine-rich repeats and immunoglobulin-like domains 1	26018
17515	GAB3	GRB2-associated binding protein 3	139716
17824	HRASLS2	HRAS-like suppressor 2	54979
18155	TXNRD2	thioredoxin reductase 2	10587
18181	SHC3	SHC (Src homology 2 domain containing) transforming protein 3	53358
18325	GAB4	GRB2-associated binding protein family, member 4	128954
18453	APOA1BP	apolipoprotein A-I binding protein	128240
18958	RASGRP4	RAS guanyl releasing protein 4	115727
19441	MINA	MYC induced nuclear antigen	84864
19663	GNG12	guanine nucleotide binding protein (G protein), gamma 12	55970
19937	YWHAQP1	YWHAQ pseudogene 1	319121
20184	JKAMP	JNK1/MAPK8-associated membrane protein	51528
20202	CACNA2D4	calcium channel, voltage-dependent, alpha 2/delta subunit 4	93589
20343	GSKIP	GSK3B interacting protein	51527
20594	EGFL7	EGF-like-domain, multiple 7	51162
20608	BDNF-AS	BDNF antisense RNA	497258
20822	ELTD1	EGF, latrophilin and seven transmembrane domain containing 1	64123
20893	BCOR	BCL6 corepressor	54880
21897	VWDE	von Willebrand factor D and EGF domains	221806
22200	TRIL	TLR4 interactor with leucine-rich repeats	9865
23098	FGFR1OP2	FGFR1 oncogene partner 2	26127
23211	YWHAQP2	YWHAQ pseudogene 2	246716
23386	MYCBP2	MYC binding protein 2, E3 ubiquitin protein ligase	23077
23953	BCORP1	BCL6 corepressor pseudogene 1	286554
24009	APOOL	apolipoprotein O-like	139322
24086	A1CF	APOBEC1 complementation factor	29974
24100	APOBEC3H	apolipoprotein B mRNA editing enzyme, catalytic polypeptide-like 3H	164668
24325	CDKN2AIP	CDKN2A interacting protein	55602
24456	DNER	delta/notch-like EGF repeat containing	92737
24696	SNED1	sushi, nidogen and EGF-like domains 1	25992
24978	HRASLS5	HRAS-like suppressor family, member 5	117245
25149	EGFEM1P	EGF-like and EMI domain containing 1, pseudogene	93556
25268	APOLD1	apolipoprotein L domain containing 1	81575
25412	SGIP1	SH3-domain GRB2-like (endophilin) interacting protein 1	84251
25657	BCORL1	BCL6 corepressor-like 1	63035
26136	GAREM	GRB2 associated, regulator of MAPK1	64762
26487	VWCE	von Willebrand factor C and EGF domains	220001
26588	GAPT	GRB2-binding adaptor protein, transmembrane	202309
26810	EGFLAM	EGF-like, fibronectin type III and laminin G domains	133584
27172	GAREML	GRB2 associated, regulator of MAPK1-like	150946
27377	CACNA1G-AS1	CACNA1G antisense RNA 1	253962
28150	CRELD2	cysteine-rich with EGF-like domains 2	79174
28426	AKT1S1	AKT1 substrate 1 (proline-rich)	84335
28526	EOGT	EGF domain-specific O-linked N-acetylglucosamine (GlcNAc) transferase	285203
28727	APOO	apolipoprotein O	79135
28883	PPA2	pyrophosphatase (inorganic) 2	27068
29227	HEG1	heart development protein with EGF-like domains 1	57493
29426	CCBE1	collagen and calcium binding EGF domains 1	147372
29506	SRCIN1	SRC kinase signaling inhibitor 1	80725
29634	MEGF10	multiple EGF-like-domains 10	84466
29635	MEGF11	multiple EGF-like-domains 11	84465
29862	NRG4	neuregulin 4	145957
29869	SHC2	SHC (Src homology 2 domain containing) transforming protein 2	25759
30034	PIK3AP1	phosphoinositide-3-kinase adaptor protein 1	118788
30035	PIK3R5	phosphoinositide-3-kinase, regulatory subunit 5	23533
30425	SCUBE2	signal peptide, CUB domain, EGF-like 2	57758
30545	CDKN2AIPNL	CDKN2A interacting protein N-terminal like	91368
31429	NRG3-AS1	NRG3 antisense RNA 1	414242
32152	APOBEC4	apolipoprotein B mRNA editing enzyme, catalytic polypeptide-like 4 (putative)	403314
33527	INS-IGF2	INS-IGF2 readthrough	723961
37240	GRAPL	GRB2-related adaptor protein-like	400581
37682	YWHAQP3	YWHAQ pseudogene 3	100128944
37683	YWHAQP4	YWHAQ pseudogene 4	646954
37684	YWHAQP5	YWHAQ pseudogene 5	100130391
37685	YWHAQP6	YWHAQ pseudogene 6	101290504
37686	YWHAQP7	YWHAQ pseudogene 7	100422674
37687	YWHAQP8	YWHAQ pseudogene 8	392510
37688	YWHAQP9	YWHAQ pseudogene 9	101290508
39021	ELK1P1	ELK1, member of ETS oncogene family pseudogene 1	647102
39706	FGFR1OP2P1	FGFR1 oncogene partner 2 pseudogene 1	100873883
39853	CDKN2AIPNLP3	CDKN2A interacting protein N-terminal like pseudogene 3	100874397
39854	CDKN2AIPNLP1	CDKN2A interacting protein N-terminal like pseudogene 1	391169
39855	CDKN2AIPNLP2	CDKN2A interacting protein N-terminal like pseudogene 2	100128579
40079	APOA1-AS	APOA1 antisense RNA
40116	CACNA1C-AS4	CACNA1C antisense RNA 4	100874234
40117	CACNA1C-AS3	CACNA1C antisense RNA 3
40118	CACNA1C-AS2	CACNA1C antisense RNA 2	100874235
40119	CACNA1C-AS1	CACNA1C antisense RNA 1	100652846
40207	EGFR-AS1	EGFR antisense RNA 1	100507500
40608	VAV3-AS1	VAV3 antisense RNA 1	100873946
40702	CACNA2D3-AS1	CACNA2D3 antisense RNA 1	100874237
41304	AKT3-IT1	AKT3 intronic transcript 1 (non-protein coding)	100874263
41312	CACNA1C-IT1	CACNA1C intronic transcript 1 (non-protein coding)	100874368
41313	CACNA1C-IT2	CACNA1C intronic transcript 2 (non-protein coding)	100874369
41314	CACNA1C-IT3	CACNA1C intronic transcript 3 (non-protein coding)	100874370
41376	RASA2-IT1	RASA2 intronic transcript 1 (non-protein coding)	100874298
41385	SOS1-IT1	SOS1 intronic transcript 1 (non-protein coding)	100505911
41389	TGFA-IT1	TGFA intronic transcript 1 (non-protein coding)	100874273
42399	CDKN1A-AS1	CDKN1A antisense RNA 1	100861512
43633	NRG1-IT1	NRG1 intronic transcript 1 (non-protein coding)	100856811
43634	NRG1-IT2	NRG1 intronic transcript 2 (non-protein coding)	100874285
43635	NRG1-IT3	NRG1 intronic transcript 3 (non-protein coding)	100874286
43738	MAPT-AS1	MAPT antisense RNA 1	100128977
43741	MAPT-IT1	MAPT intronic transcript 1 (non-protein coding)	100130148
43836	APOBEC3B-AS1	APOBEC3B antisense RNA 1	100874530
43877	BANCR	BRAF-activated non-protein coding RNA	100885775
43938	GNG12-AS1	GNG12 antisense RNA 1	100289178
44048	PANDAR	promoter of CDKN1A antisense DNA damage activated RNA	101154753
44055	FOSL1P1	FOS-like antigen 1 pseudogene 1	100419062
44196	APOBEC3A_B	APOBEC3A and APOBEC3B deletion hybrid	100913187
44426	APOC4-APOC2	APOC4-APOC2 readthrough (NMD candidate)	100533990
49404	ERICD	E2F1-regulated inhibitor of cell death (non-protein coding)
49759	JKAMPP1	JNK1/MAPK8-associated membrane protein pseudogene 1	100049717
49780	RAP1BP1	RAP1B, member of RAS oncogene family pseudogene 1	100506390
49781	RAP1BP2	RAP1B, member of RAS oncogene family pseudogene 2	100128179
49782	RAP1BP3	RAP1B, member of RAS oncogene family pseudogene 3	100132917

## Sheet: GeneExpression
PI3K					ERK
gene	trastuzumab	pertuzumab	combination		gene	trastuzumab	pertuzumab	combination
AKT1	1.05068	1.066	1.09812		APOA1	1.00899	1.1002	1.03851
AKT1	1.10622	1.08235	1.21772		APOA1BP	1.00674	1.09678	1.04059
AKT1	0.965941	1.03665	1.00823		APOA2	0.996306	1.05031	0.974874
AKT2	0.964079	1.00366	0.930576		APOA4	0.992178	1.00469	0.971587
AKT3	0.998787	1.00774	1.04944		APOA5	0.98985	0.946984	0.89882
AKT3	1.01194	0.99618	0.973962		APOB	0.969226	1.01694	0.941652
AKT3	0.983058	1.01456	0.97359		APOB48R	0.988992	0.949997	1.0148
AKT3	0.994476	0.985976	0.931081		APOBEC1	0.980957	0.956953	0.931847
AKTIP	0.948139	0.845924	0.916257		APOBEC2	1.11815	1.0641	1.09002
AKTIP	0.902023	0.821842	0.880413		APOBEC3A	1.04649	0.998183	1.04345
ANGPT1	0.968767	1.05496	0.984068		APOBEC3B	1.08608	1.13189	1.19539
ANGPT1	0.959639	0.94262	0.960217		APOBEC3C	1.03436	1.02205	1.03593
ANGPT2	1.38901	1.10286	1.0854		APOBEC3D	0.963859	0.989203	1.07195
ANGPT4	1.03997	0.990671	1.02527		APOBEC3F	1.12046	1.14268	1.0577
BCL2L11	1.0238	1.05467	1.03208		APOBEC3F	0.941713	1.07898	0.937245
BCL2L11	0.997414	0.964896	0.942216		APOBEC3F	1.02375	1.04897	1.036
BCL2L11	1.00903	1.08644	1.06495		APOBEC3F	1.05449	1.05932	1.15577
BCL6	1.06632	1.06996	1.00452		APOBEC3G	1.16798	1.11681	1.09358
BCL6	1.03494	0.944622	0.701854		APOBEC3G	1.06429	1.10389	0.931218
CCNG2	1.15218	0.921949	1.0465		APOBEC3H	1.0573	0.976987	1.11621
CCNG2	1.04745	0.821385	0.99425		APOBEC4	1.0382	1.00394	0.960442
CD19	0.935926	0.940761	0.966761		APOC1	1.01012	1.14785	1.03896
CDC2	0.910626	1.02451	1.12731		APOC2	0.94231	0.989901	0.911298
CDC2	0.888742	0.984084	1.06437		APOC3	1.02985	0.963927	0.960895
CDKN1A	1.8194	1.40747	2.07814		APOC4	0.980644	0.933569	0.978884
CDKN1A	1.04856	1.03573	1.0026		APOD	0.927735	0.997124	1.11983
CDKN1B	0.976609	0.943869	1.05822		APOE	0.538329	0.890246	2.20612
CDKN1B	1.00889	0.948783	1.00694		APOF	0.983965	0.979948	0.931836
CDKN2A	0.999728	0.916341	0.989093		APOH	1.00894	0.982515	1.08808
CDKN2A	0.964434	1.00325	0.944911		APOL1	1.05066	1.02381	0.900327
CDKN2A	1.01481	1.06444	1.03721		APOL1	1.04897	1.05644	0.9572
CHAD	0.974967	0.990948	0.98467		APOL2	1.15054	0.92297	0.902963
CSF1	0.939965	1.01777	0.9699		APOL2	0.987356	0.935442	0.971234
CSF1	1.07064	1.14413	0.992192		APOL2	1.04813	1.05448	1.0764
CSF1	0.982018	0.974654	0.998608		APOL2	1.17158	0.989608	0.899584
CSF1R	1.09249	1.10862	1.05923		APOL3	1.05053	1.01569	1.01368
CSF3	1.04272	1.04963	1.05971		APOL3	0.944917	1.15235	0.828806
CSF3	1.00499	0.992127	0.925936		APOL3	0.957843	0.979148	0.929241
CSF3	1.05597	1.0161	1.06784		APOL4	0.959106	1.01479	1.05112
CSF3R	0.958933	0.950586	0.977072		APOL4	1.20485	0.961218	1.00214
CSF3R	0.974076	0.99927	1.06716		APOL5	1.00757	1.03631	0.998036
CYP7A1	1.05367	1.00419	1.05285		APOL6	0.967349	1.00063	0.844812
E2F1	1.02034	1.04133	0.98331		APOLD1	1.1098	0.879138	0.836541
EGF	0.989478	0.993322	0.998456		APOM	0.974805	0.964456	0.953581
EGFR	1.03502	1.10044	0.987061		APOO	0.884304	0.901056	1.02534
EGFR	0.974375	1.00272	0.949323		APOOL	0.924065	1.01164	0.934276
EGFR	0.955032	0.951819	1.02179		ARAF	1.04194	1.12894	1.22702
EGFR	1.10796	1.09467	0.954808		AREG	0.952319	0.985073	0.974495
EPHA2	0.794722	1.20273	0.726891		ATF4	1.05061	0.955807	1.00315
EPO	1.00989	1.02242	1.06004		ATF4	1.01726	0.974004	1.03442
EPOR	1.10946	1.02336	1.06202		ATF4	1.01326	0.996048	0.96616
ERAS	1.0889	0.961063	1.04371		BDNF	0.981176	0.981064	0.938892
ERBB2	0.990526	0.997412	0.984989		BDNF	0.969843	0.983479	0.99902
ERBB2	0.978283	0.947779	1.0074		BDNF	0.920637	0.979155	0.91948
ERBB2	1.0859	1.07854	1.20161		BDNF	0.970051	0.98923	0.899023
ERBB3	1.01904	1.00217	1.08329		BDNF	0.987697	0.962967	0.961156
ERBB3	0.998544	1.06128	1.06762		BDNF	0.950745	1.00266	1.03865
ERBB3	1.25209	1.13549	1.81621		BDNF	0.866621	0.926434	0.748916
ERBB4	0.996934	0.989355	1.01692		BRAF	0.988292	0.984941	1.00711
EREG	0.962344	1.15216	0.869593		BTC	0.965882	1.03591	0.950726
FASLG	1.01149	0.994419	0.99687		CACNA1A	1.05743	0.977997	1.07265
FLT1	1.02617	1.00031	0.96831		CACNA1A	1.03737	0.997025	1.03535
FLT4	1.07676	1.02863	1.04541		CACNA1B	0.989427	0.981196	0.915885
FLT4	0.949811	0.95747	0.981149		CACNA1C	1.03911	1.05096	1.0211
FLT4	0.976227	0.94318	0.984371		CACNA1C	1.00342	0.984444	1.03738
FOS	1.39504	1.39547	0.846518		CACNA1C	0.968448	1.03262	1.01417
FOSB	1.06086	1.02174	1.23943		CACNA1D	1.04291	1.03647	0.963784
FOSL1	1.07614	1.14029	0.954964		CACNA1E	1.00589	1.01458	1.02663
FOSL2	1.01666	0.971537	0.935102		CACNA1F	1.12548	1.10948	1.02693
FOXO1	1.22259	1.07221	1.31472		CACNA1G	1.01852	1.04473	1.06467
FOXO3	1.02605	1.12872	0.993181		CACNA1G	1.07195	1.09751	1.02806
FOXO3	1.0485	1.06392	1.07413		CACNA1G	1.13113	1.08694	1.00211
FOXO3	0.934958	0.96451	1.02876		CACNA1G	0.995796	0.997484	1.01338
FOXO3	1.11484	1.05217	1.03895		CACNA1H	1.33351	1.00583	1.23231
FOXO4	1.00418	0.949305	1.20031		CACNA1H	1.14192	1.01915	1.07519
FRAP1	0.890062	1.00542	1.04141		CACNA1I	0.968787	0.945031	0.968086
GABARAPL2	0.842245	0.832225	0.953118		CACNA1I	0.941771	0.975737	0.944453
GABARAPL2	1.0594	1.02306	1.10084		CACNA1S	1.03726	1.05149	0.987304
GHR	1.05014	0.993712	1.01267		CACNA2D1	0.985683	0.962011	0.930314
GSK3A	0.976229	0.903206	0.929643		CACNA2D2	1.08304	0.968716	1.1692
GSK3B	0.95719	1.17605	0.997974		CACNA2D2	0.934537	0.990555	0.974545
HBEGF	1.12606	1.1152	1.13294		CACNA2D3	0.997704	0.860159	0.94704
HGF	1.04909	1.01479	1.03411		CACNA2D4	0.926048	0.937068	0.97194
HGF	0.961586	0.992284	0.942595		CACNA2D4	1.02958	1.02777	1.00965
HGF	1.02236	1.02086	1.05704		CACNB1	1.08067	0.996675	1.02049
IFNAR1	0.935222	0.917434	0.933325		CACNB1	0.989568	0.967913	0.922283
IFNAR2	1.03169	1.21431	0.925061		CACNB1	1.03167	1.043	0.965828
IFNAR2	1.01908	1.09138	0.8862		CACNB1	1.01402	1.01103	1.01483
IFNAR2	1.07332	1.02796	0.986193		CACNB2	0.969257	0.962757	1.00769
IGF1	0.998385	0.975408	0.98159		CACNB2	1.00806	0.978305	0.984909
IGF1	0.945542	0.999512	0.971419		CACNB2	1.01133	1.06612	1.01546
IGF1R	1.1069	1.05526	1.11576		CACNB2	1.08549	0.987129	1.04969
IL2	1.01917	1.03002	1.02601		CACNB2	0.963399	0.913689	0.939876
IL2RA	1.05012	1.01752	1.02131		CACNB3	1.14667	1.02176	1.12498
IL2RA	1.02602	0.936955	1.02188		CACNB4	1.09294	1.02122	1.08753
IL2RB	0.987438	1.1567	1.02269		CACNB4	1.00013	0.991501	0.968967
IL2RG	1.03759	0.955005	0.99947		CACNB4	0.993575	0.973002	1.00607
IL3	1.00869	0.940805	0.948867		CACNG1	1.00219	1.02833	0.974935
IL3RA	1.01823	0.995556	1.03023		CACNG2	1.00152	0.953371	0.994751
IL4	1.06017	1.04533	1.05692		CACNG3	0.96074	0.939948	0.917862
IL4	0.982919	1.04224	0.983171		CACNG4	0.985552	1.0164	1.06751
IL4R	0.983171	1.05133	0.979625		CACNG5	1.03675	1.06102	1.09165
IL4R	1.03756	1.30534	1.05465		CACNG5	0.97366	0.962411	1.07176
IL6	0.932648	1.07216	0.684534		CACNG5	1.05782	1.03286	1.05298
IL6R	1.13854	1.0954	1.24782		CACNG6	1.01567	0.978983	0.988907
IL6R	1.08346	0.950777	1.53543		CACNG6	1.09034	1.08295	1.03945
IL7	0.987775	1.00972	0.959748		CACNG6	0.976962	0.969727	0.972377
IL7	0.921619	1.05503	0.892826		CACNG7	1.04352	1.02616	1.0183
IL7R	0.976893	0.955335	0.994752		CACNG8	1.04527	1.04148	0.988094
IL7R	1.03254	1.04791	1.00613		CACNG8	0.941722	0.965804	0.876991
INS	0.986806	0.983629	0.927502		CCNG2	1.15218	0.921949	1.0465
INS-IGF2	0.971695	0.9869	0.976808		CCNG2	1.04745	0.821385	0.99425
INS-IGF2	1.02354	0.994299	0.998512		CDC2	0.910626	1.02451	1.12731
INSR	0.969167	0.986194	0.970526		CDC2	0.888742	0.984084	1.06437
IRS1	1.00685	0.985604	1.00019		CDKN1A	1.8194	1.40747	2.07814
IRS2	1.06437	0.978336	1.11091		CDKN1A	1.04856	1.03573	1.0026
JAK1	0.879336	0.988621	0.8521		CDKN1B	0.976609	0.943869	1.05822
JAK2	1.00282	0.998561	1.03886		CDKN1B	1.00889	0.948783	1.00694
JAK3	0.954266	0.989715	1.11629		CDKN2A	0.999728	0.916341	0.989093
JUN	1.50469	1.3073	1.50896		CDKN2A	0.964434	1.00325	0.944911
JUNB	1.08724	1.31274	0.822639		CDKN2A	1.01481	1.06444	1.03721
JUND	0.971599	1.02133	1.16596		CYP7A1	1.05367	1.00419	1.05285
KDR	1.03788	1.03689	1.0601		DUSP1	1.32631	1.28296	0.879066
KIT	1.04006	0.797827	0.905516		DUSP2	1.03615	1.01291	1.07743
KIT	1.0069	0.782209	0.920147		DUSP3	1.04604	1.05432	1.05994
KITLG	0.825438	1.17323	0.5165		DUSP4	1.03528	1.01378	0.973892
KITLG	0.849497	1.07875	0.542922		DUSP4	1.07729	1.11588	1.02966
KITLG	0.914323	1.06142	0.887667		DUSP5	1.07338	1.07	1.152
LAMA4	1.04277	1.08454	0.947577		DUSP5P	0.917609	1.00275	1.02491
LAMA4	0.993853	0.961559	1.14073		DUSP5P	1.01596	0.992525	1.01854
LAMB1	0.837166	0.941686	0.897331		DUSP6	1.30801	1.00814	1.54783
LAMB1	0.8631	0.948755	0.928193		DUSP6	1.25075	0.957316	1.51625
LAMB2	1.13267	0.96125	1.10396		EGF	0.989478	0.993322	0.998456
LAMB3	1.289	1.40821	0.938251		EGFR	1.03502	1.10044	0.987061
LAMB3	0.984798	1.04501	1.00189		EGFR	0.974375	1.00272	0.949323
LAMB3	1.01711	1.13448	0.965859		EGFR	0.955032	0.951819	1.02179
LAMB4	1.05983	1.05148	1.09191		EGFR	1.10796	1.09467	0.954808
LAMC1	0.846713	0.918074	0.763339		ELK1	1.00421	1.06983	1.02191
LAMC2	1.01176	1.4242	0.608463		ELK3	1.02378	1.12931	0.985069
LAMC2	0.952562	1.20994	0.729117		ELK4	0.913821	0.993695	0.911434
LAMC2	1.21061	1.64887	0.567952		ELK4	1.01881	0.975117	0.981125
LAMC3	1.19532	1.02241	1.38458		ELK4	0.915472	1.01994	1.0117
MET	0.929743	0.961797	0.874997		ELK4	0.985053	1.08469	1.00964
MLH3	0.995534	1.02007	0.971261		ERAS	1.0889	0.961063	1.04371
MLH3	0.939634	0.938987	0.932391		EREG	0.962344	1.15216	0.869593
MYC	1.05124	1.26596	1.07217		FASLG	1.01149	0.994419	0.99687
MYC	1.03166	1.23185	1.00965		FGFR1	1.02459	0.952825	0.956246
NGFR	0.97948	1.0063	1.10031		FGFR1	1.03662	1.0491	1.11385
NRAS	0.958963	1.03092	0.859876		FGFR1	1.07306	1.08631	1.13694
NRG1	0.93502	0.973928	0.929796		FGFR2	0.94654	0.931676	0.988592
NRG1	1.00364	0.985592	1.00079		FGFR3	1.02687	0.937458	1.00065
NRG1	0.982522	1.14475	0.847737		FGFR3	1.10098	0.977803	1.48529
NRG1	0.987337	1.05154	1.00246		FGFR4	0.931304	1.04213	1.21219
NRG1	0.988728	1.06276	1.03202		FGFR4	0.980291	1.02195	0.986231
NRG2	1.02325	0.972284	0.967058		FGFR4	0.938261	0.90998	1.04189
NRG2	1.02206	1.05249	1.03036		FOS	1.39504	1.39547	0.846518
NRG3	0.964003	0.988265	1.00771		GAB1	0.989686	0.955229	0.999188
NRG4	1.29884	0.975726	1.15971		GAB1	1.06464	0.980568	1.06287
OSM	1.05452	0.972108	0.994536		GAB1	1.06036	0.922948	1.10823
OSMR	0.800768	1.05117	0.711292		GABARAPL2	0.842245	0.832225	0.953118
PDGFA	0.655368	1.09449	0.919378		GABARAPL2	1.0594	1.02306	1.10084
PDGFA	0.952009	1.0019	1.02362		GNA12	0.923146	1.13175	0.950314
PDGFA	0.936023	0.998051	0.958599		GNA12	1.02799	1.13137	0.985124
PDGFB	1.02194	1.03348	1.0323		GNA12	1.01295	1.01164	0.96906
PDGFB	1.18251	1.04411	1.02507		GNG12	0.967065	1.02501	0.952006
PDGFB	1.12828	1.04625	1.03629		GPX1	0.979849	1.16566	0.962207
PDGFRA	1.00853	1.00404	1.05217		GPX1	0.984083	0.948656	1.01457
PDGFRA	0.958116	0.91648	1.00352		GPX2	2.41122	2.38956	1.72889
PDGFRB	0.985674	0.961054	1.00819		GPX3	0.950949	0.96937	0.994438
PDK1	0.989244	0.962874	0.979387		GPX4	1.10748	1.1972	1.2107
PDK2	1.05479	1.01467	1.06312		GPX4	1.09646	1.13403	1.17588
PDK3	0.89534	0.994599	0.742174		GPX5	1.07223	1.08309	1.02605
PDK4	0.938718	0.84481	1.20113		GPX5	0.939182	0.972537	0.974492
PGF	1.39426	1.17022	1.10499		GPX5	1.0075	0.983474	1.04491
PIK3AP1	0.949717	1.03827	0.760722		GPX6	0.969174	1.00141	0.990365
PIK3C2A	1.02475	1.03887	1.04458		GPX7	1.04119	0.961911	1.03503
PIK3C2B	0.994219	1.01617	1.03572		GRB2	0.982181	0.982822	1.02036
PIK3C2G	0.96565	0.94658	0.917721		GRB2	1.04172	1.27059	1.12488
PIK3C3	0.967107	0.913358	0.944821		PRDX6	0.969582	0.962427	1.02843
PIK3CA	0.998596	1.08695	1.01279		HBEGF	1.12606	1.1152	1.13294
PIK3CA	0.984165	1.02142	0.976731		HGS	1.07725	1.13614	1.1245
PIK3CB	0.969731	0.932079	0.933421		HRAS	1.02331	1.08272	0.971736
PIK3CD	0.958834	1.0584	0.97751		HRAS	1.11394	1.01414	1.07189
PIK3CG	0.903246	0.958038	0.958537		HSPA1A	1.3023	1.4451	1.05833
PIK3R1	0.95614	0.791016	0.876398		HSPA1B	1.29521	1.40133	1.05235
PIK3R1	0.989228	0.933679	0.997344		HSPB1	1.13021	1.25165	1.17661
PIK3R1	0.973869	0.931398	0.920513		IGF1R	1.1069	1.05526	1.11576
PIK3R1	0.962858	0.967871	0.970613		INSR	0.969167	0.986194	0.970526
PIK3R1	0.921839	0.930068	0.89889		IRS1	1.00685	0.985604	1.00019
PIK3R2	1.1503	1.16005	1.33136		IRS2	1.06437	0.978336	1.11091
PIK3R3	0.968063	0.916658	1.0772		KRAS	0.977132	0.904747	0.998529
PIK3R4	0.909476	0.977835	0.902639		KRAS	1.00315	0.967764	1.0143
PIK3R5	0.865849	0.919163	0.935047		LRIG1	1.07851	1.10009	1.43315
PPA2	1.00859	0.904035	0.929955		LRIG1	1.09363	1.06595	1.58512
PPA2	1.08739	0.950421	1.06335		MAP2K1	1.01842	1.061	0.946084
PPA2	0.969151	1.01917	1.07139		MAP2K2	0.923119	1.11362	1.12303
PRDX6	0.969582	0.962427	1.02843		MAPK1	0.91626	0.938676	0.847069
PRL	0.995314	0.932708	0.994423		MAPK1	0.921163	1.02105	0.851617
PRLR	0.97911	1.06892	1.0732		MAPK1	0.975908	1.10116	0.916857
PRLR	0.949362	0.955495	1.00962		MAPK10	0.98437	0.978664	1.03179
RAF1	0.970105	0.966814	0.965096		MAPK10	1.0782	0.869824	1.1253
RELN	1.03666	1.07644	1.0687		MAPK10	1.03016	0.996255	0.998252
RELN	1.03312	1.06168	1.05256		MAPK10	1.05666	1.00466	1.0975
SFN	1.37474	1.97723	0.701337		MAPK10	1.01588	0.938914	1.13564
SH3GLB1	1.03772	1.0564	0.984317		MAPK3	1.08191	1.093	1.0233
SHC1	0.949013	1.05797	0.977612		MAPK3	1.03218	1.04669	1.02975
SHC1	1.07462	1.06447	0.986109		MAPK4	0.950086	0.964318	0.98487
SHC1	0.99701	1.134	0.900685		MAPK4	1.11233	1.03917	1.07844
SHC2	0.991479	0.983432	1.04123		MAPK6	1.00336	0.997015	0.949167
SHC2	1.11651	1.03857	1.05008		MAPK8	0.937834	0.945751	0.880629
SHC2	1.01594	0.922766	1.03786		MAPK8	1.06914	1.05476	0.974894
SHC2	1.13687	0.956459	1.03039		MAPK9	1.03022	1.01144	0.977808
SHC3	1.07836	1.01659	1.08466		MAPK9	0.876788	0.951018	0.931291
SLC12A6	1.01066	0.986356	0.992231		MAPT	0.98117	1.02064	1.04095
SLC12A6	0.948307	0.954006	0.984115		MAPT	1.17932	1.00041	1.14823
SOD2	0.868809	1.16464	0.653208		MAPT	1.04689	0.99988	0.993189
SOD2	0.774071	1.08628	0.631524		MAPT	1.09282	0.960582	1.01747
SOD2	1.05194	1.04755	0.973524		MLH3	0.995534	1.02007	0.971261
SRC	1.01593	1.00171	0.971256		MLH3	0.939634	0.938987	0.932391
SRC	0.932222	0.903683	0.938023		MOS	0.997826	1.12044	1.0861
SRC	1.05616	1.07132	1.23583		MRAS	1.00964	1.01492	1.08329
SYK	1.20959	1.25539	1.42473		MYC	1.05124	1.26596	1.07217
TEK	0.986098	0.970358	1.01111		MYC	1.03166	1.23185	1.00965
TEK	0.965523	0.954735	0.963264		NF1	1.04193	0.971679	1.01648
TGFBR2	0.963885	0.984287	0.945104		NRAS	0.958963	1.03092	0.859876
TGFBR2	1.02671	1.0509	0.981919		NTF3	1.03131	1.02981	1.03463
TGFBR2	1.0515	1.06403	0.993075		NTRK1	0.974968	1.02248	0.971209
THBS1	1.10434	1.31786	0.699647		NTRK1	1.09056	1.03373	1.0384
TLR2	0.932491	0.960052	0.95956		NTRK1	0.968525	1.02327	0.966791
TLR4	0.934644	0.999886	0.949555		NTRK2	0.966555	0.959863	0.90689
TXNRD1	0.860811	0.896027	1.02852		NTRK2	0.986869	0.929698	0.949662
TXNRD1	0.848872	0.91249	1.00255		NTRK2	0.990089	0.94641	0.959027
TXNRD2	1.04355	1.0253	1.08876		RAC1	0.949857	1.00909	1.03661
TXNRD2	1.04282	1.07892	1.0082		RAC1	1.17307	1.11359	1.54573
TXNRD2	1.00542	0.969619	1.01775		RAC1	0.993949	1.01416	0.958931
VAV1	1.03827	0.965503	1.14567		RAF1	0.970105	0.966814	0.965096
VAV3	0.977377	1.02571	1.02521		RAP1A	0.945454	0.985119	0.93491
VAV3	1.12445	0.761275	1.11399		RAP1A	0.965138	0.974334	0.916837
VAV3	1.16682	0.772427	1.07573		RAP1B	0.951562	0.942281	0.942532
VEGFA	1.79073	1.13809	0.846204		RAP1B	0.923443	0.90394	0.843094
VEGFA	1.37552	1.07367	0.937173		RASA1	0.947596	0.99688	1.02204
VEGFA	1.05522	0.988093	1.02022		RASA1	1.0767	1.02399	1.02893
VEGFB	0.9734	0.901799	0.996616		RASA1	1.03484	1.05475	1.03679
VEGFB	1.20386	1.16938	1.21891		RASA2	0.996855	1.02743	0.950585
VEGFB	1.08367	1.04102	1.08406		RASGRF1	1.00151	0.993202	0.95925
VEGFB	1.06784	1.05016	1.04291		RASGRF1	0.979368	0.985841	1.02641
YWHAB	0.918978	0.951582	0.911836		RASGRF2	0.95822	0.975954	1.00192
YWHAB	0.908475	1.19417	1.04056		RASGRP1	1.05514	1.00749	0.924562
YWHAE	1.01993	1.05226	1.01789		RASGRP2	0.962921	0.949434	0.957094
YWHAE	0.846576	0.889752	1.00114		RASGRP2	1.07166	0.981706	0.993276
YWHAE	0.983817	0.9509	0.945074		RASGRP2	1.01846	0.97767	0.953583
YWHAG	1.01949	1.05295	0.91294		RASGRP3	0.785641	0.989639	0.551909
YWHAG	0.923987	0.961608	0.860619		RASGRP4	0.970552	1.03881	0.986197
YWHAH	0.923716	1.11915	1.06743		RASGRP4	1.0144	0.983699	0.959318
YWHAQ	1.04741	1.04677	0.976118		RASGRP4	0.985665	1.04078	0.983633
YWHAZ	1.00132	0.990928	0.97927		RASGRP4	0.979341	0.975764	0.987431
YWHAZ	1.06962	0.943586	1.1455		RRAS	1.03488	1.16276	0.941471
GSK3A	0.976229	0.903206	0.929643		RRAS2	0.961197	1.01702	0.869996
GSK3B	0.95719	1.17605	0.997974		RRAS2	1.01419	1.09254	1.01216
TGFA	1.08849	1.03486	1.00336		SFN	1.37474	1.97723	0.701337
TGFA	1.05948	1.06661	0.904511		SLC12A6	1.01066	0.986356	0.992231
TGFB1	1.04156	1.11513	1.00458		SLC12A6	0.948307	0.954006	0.984115
TGFB2	1.02694	1.07586	0.966775		SOS1	1.14818	1.103	1.1041
TGFB3	0.940304	0.924553	0.91063		SOS2	1.04725	1.0161	1.0059
TGFBR2	1.0515	1.06403	0.993075		SRF	1.06419	1.14787	1.13056
STMN1	1.04028	1.08439	1.0871		TNFRSF1A	0.94601	1.10842	0.833112
STMN1	0.822429	0.86267	1.01028
STMN1	0.984407	0.998574	0.957259
STMN1	0.925644	0.924224	0.997405

## Sheet: Sheet3
PI3K
	tra	per	com
AKT1	1.05068	1.066	1.09812
AKT1	1.10622	1.08235	1.21772
AKT1	0.965941	1.03665	1.00823
AKT2	0.964079	1.00366	0.930576
AKT3	0.998787	1.00774	1.04944
AKT3	1.01194	0.99618	0.973962
AKT3	0.983058	1.01456	0.97359
AKT3	0.994476	0.985976	0.931081
AKTIP	0.948139	0.845924	0.916257
AKTIP	0.902023	0.821842	0.880413
ANGPT1	0.968767	1.05496	0.984068
ANGPT1	0.959639	0.94262	0.960217
ANGPT2	1.38901	1.10286	1.0854
ANGPT4	1.03997	0.990671	1.02527
BCL2L11	1.0238	1.05467	1.03208
BCL2L11	0.997414	0.964896	0.942216
BCL2L11	1.00903	1.08644	1.06495
BCL6	1.06632	1.06996	1.00452
BCL6	1.03494	0.944622	0.701854
CCNG2	1.15218	0.921949	1.0465
CCNG2	1.04745	0.821385	0.99425
CD19	0.935926	0.940761	0.966761
CDC2	0.910626	1.02451	1.12731
CDC2	0.888742	0.984084	1.06437
CDKN1A	1.8194	1.40747	2.07814
CDKN1A	1.04856	1.03573	1.0026
CDKN1B	0.976609	0.943869	1.05822
CDKN1B	1.00889	0.948783	1.00694
CDKN2A	0.999728	0.916341	0.989093
CDKN2A	0.964434	1.00325	0.944911
CDKN2A	1.01481	1.06444	1.03721
CHAD	0.974967	0.990948	0.98467
CSF1	0.939965	1.01777	0.9699
CSF1	1.07064	1.14413	0.992192
CSF1	0.982018	0.974654	0.998608
CSF1R	1.09249	1.10862	1.05923
CSF3	1.04272	1.04963	1.05971
CSF3	1.00499	0.992127	0.925936
CSF3	1.05597	1.0161	1.06784
CSF3R	0.958933	0.950586	0.977072
CSF3R	0.974076	0.99927	1.06716
CYP7A1	1.05367	1.00419	1.05285
E2F1	1.02034	1.04133	0.98331
EGF	0.989478	0.993322	0.998456
EGFR	1.03502	1.10044	0.987061
EGFR	0.974375	1.00272	0.949323
EGFR	0.955032	0.951819	1.02179
EGFR	1.10796	1.09467	0.954808
EPHA2	0.794722	1.20273	0.726891
EPO	1.00989	1.02242	1.06004
EPOR	1.10946	1.02336	1.06202
ERAS	1.0889	0.961063	1.04371
ERBB2	0.990526	0.997412	0.984989
ERBB2	0.978283	0.947779	1.0074
ERBB2	1.0859	1.07854	1.20161
ERBB3	1.01904	1.00217	1.08329
ERBB3	0.998544	1.06128	1.06762
ERBB3	1.25209	1.13549	1.81621
ERBB4	0.996934	0.989355	1.01692
EREG	0.962344	1.15216	0.869593
FASLG	1.01149	0.994419	0.99687
FLT1	1.02617	1.00031	0.96831
FLT4	1.07676	1.02863	1.04541
FLT4	0.949811	0.95747	0.981149
FLT4	0.976227	0.94318	0.984371
FOS	1.39504	1.39547	0.846518
FOSB	1.06086	1.02174	1.23943
FOSL1	1.07614	1.14029	0.954964
FOSL2	1.01666	0.971537	0.935102
FOXO1	1.22259	1.07221	1.31472
FOXO3	1.02605	1.12872	0.993181
FOXO3	1.0485	1.06392	1.07413
FOXO3	0.934958	0.96451	1.02876
FOXO3	1.11484	1.05217	1.03895
FOXO4	1.00418	0.949305	1.20031
FRAP1	0.890062	1.00542	1.04141
GABARAPL2	0.842245	0.832225	0.953118
GABARAPL2	1.0594	1.02306	1.10084
GHR	1.05014	0.993712	1.01267
GSK3A	0.976229	0.903206	0.929643
GSK3B	0.95719	1.17605	0.997974
HBEGF	1.12606	1.1152	1.13294
HGF	1.04909	1.01479	1.03411
HGF	0.961586	0.992284	0.942595
HGF	1.02236	1.02086	1.05704
IFNAR1	0.935222	0.917434	0.933325
IFNAR2	1.03169	1.21431	0.925061
IFNAR2	1.01908	1.09138	0.8862
IFNAR2	1.07332	1.02796	0.986193
IGF1	0.998385	0.975408	0.98159
IGF1	0.945542	0.999512	0.971419
IGF1R	1.1069	1.05526	1.11576
IL2	1.01917	1.03002	1.02601
IL2RA	1.05012	1.01752	1.02131
IL2RA	1.02602	0.936955	1.02188
IL2RB	0.987438	1.1567	1.02269
IL2RG	1.03759	0.955005	0.99947
IL3	1.00869	0.940805	0.948867
IL3RA	1.01823	0.995556	1.03023
IL4	1.06017	1.04533	1.05692
IL4	0.982919	1.04224	0.983171
IL4R	0.983171	1.05133	0.979625
IL4R	1.03756	1.30534	1.05465
IL6	0.932648	1.07216	0.684534
IL6R	1.13854	1.0954	1.24782
IL6R	1.08346	0.950777	1.53543
IL7	0.987775	1.00972	0.959748
IL7	0.921619	1.05503	0.892826
IL7R	0.976893	0.955335	0.994752
IL7R	1.03254	1.04791	1.00613
INS	0.986806	0.983629	0.927502
INS-IGF2	0.971695	0.9869	0.976808
INS-IGF2	1.02354	0.994299	0.998512
INSR	0.969167	0.986194	0.970526
IRS1	1.00685	0.985604	1.00019
IRS2	1.06437	0.978336	1.11091
JAK1	0.879336	0.988621	0.8521
JAK2	1.00282	0.998561	1.03886
JAK3	0.954266	0.989715	1.11629
JUN	1.50469	1.3073	1.50896
JUNB	1.08724	1.31274	0.822639
JUND	0.971599	1.02133	1.16596
KDR	1.03788	1.03689	1.0601
KIT	1.04006	0.797827	0.905516
KIT	1.0069	0.782209	0.920147
KITLG	0.825438	1.17323	0.5165
KITLG	0.849497	1.07875	0.542922
KITLG	0.914323	1.06142	0.887667
LAMA4	1.04277	1.08454	0.947577
LAMA4	0.993853	0.961559	1.14073
LAMB1	0.837166	0.941686	0.897331
LAMB1	0.8631	0.948755	0.928193
LAMB2	1.13267	0.96125	1.10396
LAMB3	1.289	1.40821	0.938251
LAMB3	0.984798	1.04501	1.00189
LAMB3	1.01711	1.13448	0.965859
LAMB4	1.05983	1.05148	1.09191
LAMC1	0.846713	0.918074	0.763339
LAMC2	1.01176	1.4242	0.608463
LAMC2	0.952562	1.20994	0.729117
LAMC2	1.21061	1.64887	0.567952
LAMC3	1.19532	1.02241	1.38458
MET	0.929743	0.961797	0.874997
MLH3	0.995534	1.02007	0.971261
MLH3	0.939634	0.938987	0.932391
MYC	1.05124	1.26596	1.07217
MYC	1.03166	1.23185	1.00965
NGFR	0.97948	1.0063	1.10031
NRAS	0.958963	1.03092	0.859876
NRG1	0.93502	0.973928	0.929796
NRG1	1.00364	0.985592	1.00079
NRG1	0.982522	1.14475	0.847737
NRG1	0.987337	1.05154	1.00246
NRG1	0.988728	1.06276	1.03202
NRG2	1.02325	0.972284	0.967058
NRG2	1.02206	1.05249	1.03036
NRG3	0.964003	0.988265	1.00771
NRG4	1.29884	0.975726	1.15971
OSM	1.05452	0.972108	0.994536
OSMR	0.800768	1.05117	0.711292
PDGFA	0.655368	1.09449	0.919378
PDGFA	0.952009	1.0019	1.02362
PDGFA	0.936023	0.998051	0.958599
PDGFB	1.02194	1.03348	1.0323
PDGFB	1.18251	1.04411	1.02507
PDGFB	1.12828	1.04625	1.03629
PDGFRA	1.00853	1.00404	1.05217
PDGFRA	0.958116	0.91648	1.00352
PDGFRB	0.985674	0.961054	1.00819
PDK1	0.989244	0.962874	0.979387
PDK2	1.05479	1.01467	1.06312
PDK3	0.89534	0.994599	0.742174
PDK4	0.938718	0.84481	1.20113
PGF	1.39426	1.17022	1.10499
PIK3AP1	0.949717	1.03827	0.760722
PIK3C2A	1.02475	1.03887	1.04458
PIK3C2B	0.994219	1.01617	1.03572
PIK3C2G	0.96565	0.94658	0.917721
PIK3C3	0.967107	0.913358	0.944821
PIK3CA	0.998596	1.08695	1.01279
PIK3CA	0.984165	1.02142	0.976731
PIK3CB	0.969731	0.932079	0.933421
PIK3CD	0.958834	1.0584	0.97751
PIK3CG	0.903246	0.958038	0.958537
PIK3R1	0.95614	0.791016	0.876398
PIK3R1	0.989228	0.933679	0.997344
PIK3R1	0.973869	0.931398	0.920513
PIK3R1	0.962858	0.967871	0.970613
PIK3R1	0.921839	0.930068	0.89889
PIK3R2	1.1503	1.16005	1.33136
PIK3R3	0.968063	0.916658	1.0772
PIK3R4	0.909476	0.977835	0.902639
PIK3R5	0.865849	0.919163	0.935047
PPA2	1.00859	0.904035	0.929955
PPA2	1.08739	0.950421	1.06335
PPA2	0.969151	1.01917	1.07139
PRDX6	0.969582	0.962427	1.02843
PRL	0.995314	0.932708	0.994423
PRLR	0.97911	1.06892	1.0732
PRLR	0.949362	0.955495	1.00962
RAF1	0.970105	0.966814	0.965096
RELN	1.03666	1.07644	1.0687
RELN	1.03312	1.06168	1.05256
SFN	1.37474	1.97723	0.701337
SH3GLB1	1.03772	1.0564	0.984317
SHC1	0.949013	1.05797	0.977612
SHC1	1.07462	1.06447	0.986109
SHC1	0.99701	1.134	0.900685
SHC2	0.991479	0.983432	1.04123
SHC2	1.11651	1.03857	1.05008
SHC2	1.01594	0.922766	1.03786
SHC2	1.13687	0.956459	1.03039
SHC3	1.07836	1.01659	1.08466
SLC12A6	1.01066	0.986356	0.992231
SLC12A6	0.948307	0.954006	0.984115
SOD2	0.868809	1.16464	0.653208
SOD2	0.774071	1.08628	0.631524
SOD2	1.05194	1.04755	0.973524
SRC	1.01593	1.00171	0.971256
SRC	0.932222	0.903683	0.938023
SRC	1.05616	1.07132	1.23583
SYK	1.20959	1.25539	1.42473
TEK	0.986098	0.970358	1.01111
TEK	0.965523	0.954735	0.963264
TGFBR2	0.963885	0.984287	0.945104
TGFBR2	1.02671	1.0509	0.981919
TGFBR2	1.0515	1.06403	0.993075
THBS1	1.10434	1.31786	0.699647
TLR2	0.932491	0.960052	0.95956
TLR4	0.934644	0.999886	0.949555
TXNRD1	0.860811	0.896027	1.02852
TXNRD1	0.848872	0.91249	1.00255
TXNRD2	1.04355	1.0253	1.08876
TXNRD2	1.04282	1.07892	1.0082
TXNRD2	1.00542	0.969619	1.01775
VAV1	1.03827	0.965503	1.14567
VAV3	0.977377	1.02571	1.02521
VAV3	1.12445	0.761275	1.11399
VAV3	1.16682	0.772427	1.07573
VEGFA	1.79073	1.13809	0.846204
VEGFA	1.37552	1.07367	0.937173
VEGFA	1.05522	0.988093	1.02022
VEGFB	0.9734	0.901799	0.996616
VEGFB	1.20386	1.16938	1.21891
VEGFB	1.08367	1.04102	1.08406
VEGFB	1.06784	1.05016	1.04291
YWHAB	0.918978	0.951582	0.911836
YWHAB	0.908475	1.19417	1.04056
YWHAE	1.01993	1.05226	1.01789
YWHAE	0.846576	0.889752	1.00114
YWHAE	0.983817	0.9509	0.945074
YWHAG	1.01949	1.05295	0.91294
YWHAG	0.923987	0.961608	0.860619
YWHAH	0.923716	1.11915	1.06743
YWHAQ	1.04741	1.04677	0.976118
YWHAZ	1.00132	0.990928	0.97927
YWHAZ	1.06962	0.943586	1.1455
GSK3A	0.976229	0.903206	0.929643
GSK3B	0.95719	1.17605	0.997974
TGFA	1.08849	1.03486	1.00336
TGFA	1.05948	1.06661	0.904511
TGFB1	1.04156	1.11513	1.00458
TGFB2	1.02694	1.07586	0.966775
TGFB3	0.940304	0.924553	0.91063
TGFBR2	1.0515	1.06403	0.993075
STMN1	1.04028	1.08439	1.0871
STMN1	0.822429	0.86267	1.01028
STMN1	0.984407	0.998574	0.957259
STMN1	0.925644	0.924224	0.997405
